# 1 Deciphering trophic interactions in a mid-Cambrian assemblage

2  
3 Anshuman Swain<sup>1</sup>, Matthew Devereux<sup>2</sup>, William F Fagan<sup>1</sup>

4 <sup>1</sup>Department of Biology, University of Maryland, College Park, MD, USA

5 <sup>2</sup>Department of Earth Science, Western University, London, ON, Canada

6 \* corresponding author: Anshuman Swain

7 **Email:** [answain@terpmail.umd.edu](mailto:answain@terpmail.umd.edu)

## 8 9 10 **Keywords**

11 Fossil networks, Preservation bias, Trophic interactions, Burgess Shale

## 12 13 14 **Abstract:**

15 The Cambrian Period (541-485 Mya) represents a major stage in the development of metazoan-dominated  
16 assemblages with complex community structure and species interactions. Exceptionally preserved fossil  
17 sites have allowed specimen-based identification of putative trophic interactions to which network  
18 analyses have been applied. However, network analyses of the fossil record suffer from incomplete and  
19 indirect data, time averaging that obscures species coexistence, and biases in preservation. Here, we  
20 present a novel high-resolution fossil dataset from the Raymond Quarry (RQ) member of the mid-  
21 Cambrian Burgess Shale (7549 specimens, 61 taxa, ~510 Mya) affording new perspectives on these  
22 challenging issues. Further, we formulate a new measure of ‘preservation bias’ that aids identification of  
23 those assemblage subsets to which network analyses can be reliably applied. For sections with sufficiently  
24 low bias, abundance correlation network analyses predicted longitudinally consistent trophic and  
25 competitive interactions. Our correlation network analyses predicted previously postulated trophic  
26 interactions with 83.5% accuracy and demonstrated a shift from specialist interaction-dominated  
27 assemblages to ones dominated by generalist and competitive interactions. This approach provides a  
28 robust, taphonomically corrected framework to explore and predict in detail the existence and ecological  
29 character of putative interactions in fossil datasets, offering new windows on ancient food-webs.

## 30 31 **Significance Statement:**

32 Understanding interactions in paleo-ecosystems has been a difficult task due to biases in collection and  
33 preservation of taxa, as well as low time resolution of data. In this work, we use network science tools and  
34 a fine scale dataset from the Cambrian period to explore: (i) preservation bias due to ecological/physical  
35 characteristics of taxa; (ii) evidence that the magnitude and sign of pairwise abundance correlations  
36 between two fossil taxa yields information concerning the ecological character about the interaction. All  
37 results in our work derive from using complex system approaches to analyze abundance data, without  
38 assuming any prior knowledge about species interactions – thereby providing a novel general framework  
39 to assess and explore fossil datasets.

## 40 41 **Introduction**

42 Evolutionarily, the Cambrian Period (541-485 Mya) is unique because it witnessed the emergence and  
43 rapid diversification of phylum-level extant animal body plans and featured the highest morphological  
44 and genetic rates of animal evolution (Erwin et al., 2011; Lee et al., 2013). Morphological disparity and  
45 behavioral complexity increased (Carbone and Narbonne, 2014; Seilacher et al., 2005), prompting  
46 hypotheses about major shifts in ecological interactions and trophic structure during this period, due to  
47 major changes such as widespread predation and active (vertical) burrowing, which may have facilitated  
48 the first complex ‘modern’ food-webs (Dunne et al., 2008; Conway-Morris, 1986; Vannier and Chen,  
49 2005, Erwin and Valentine, 2013; Mángano and Buatois, 2014). ‘Conservation lagerstätten’ sedimentary  
50 deposits, featuring exceptional fossil preservation of both ‘soft’ and ‘hard’ body features (Orr et al.,  
51 2003), permit detailed studies from which species interactions can be deduced (Butterfield, 2003).

53  
54 Network-based studies provide critical insight on the structure and function of ecological systems  
55 (Delmas et al., 2018, Posiot et al., 2016; Ings et al., 2008), but paleo-assemblages often suffer from  
56 incomplete and indirect data (Roopnarine, 2010), time-averaging across large stratigraphic sections that  
57 obscure species coexistence (Kidwell and Bosence, 1991; Dunne et al., 2008; Roopnarine, 2010;  
58 Muscente et al., 2018), and biases in preservation, collection, and identification of both specimens and  
59 interactions (Koch, 1978; Smith, 2001; Dunne et al., 2008). Although some previous network studies  
60 have been performed on almost census preserved communities, such as in the Ediacaran (Mitchell et al.,  
61 2019; Mitchell and Butterfield, 2018; Muscente et al., 2019) Here, we report a new, extensive mid-  
62 Cambrian fossil abundance dataset featuring excellent preservation with high stratigraphic resolution,  
63 consistent taxa presence, and low biases in collection and identification. Using correlation network  
64 analyses of fossil abundance data and agent-based models, we find novel statistical evidence  
65 recapitulating 71 of 85 previously known or suspected species interactions, propose 117 previously  
66 unknown putative interactions, and identify a shift from assemblages dominated by specialist interactions  
67 to ones dominated by competition and generalized interactions. All results derive directly from fossil  
68 abundance data, without assuming any prior knowledge about species interactions.

69  
70 Employing classic tools of network analysis in novel ways, we characterize fine-scale structure and  
71 dynamics of the paleo-ecological system represented by a novel 7549 specimen dataset from the  
72 Raymond Quarry (RQ) of the Middle Cambrian Burgess Shale of SE British Columbia, Canada (~510  
73 Mya, Figure 1(a); S1). This dataset, which represents one of the most complete views of early animal  
74 assemblages, consists of species-wise abundance for 61 taxa in 10 cm levels across 9.3 m of shale.  
75 Previous network studies of paleontological data (e.g., Dunne et al., 2008) have focused on the Walcott  
76 Quarry, which is from the same geological period and has much higher species diversity than RQ, but  
77 unlike RQ lacks consistent species preservation across stratigraphic slices (Devereux, 2001). Therefore,  
78 this new dataset's fine-scale spatial resolution and the site's exceptional, consistent preservation of soft-  
79 bodied organisms offer advantages not available to most earlier paleo-assemblage network analyses  
80 (Dormann et al., 2017, Dunne et al., 2008). Moreover, in addition to unique usage of network methods,  
81 we utilized agent-based models to quantify and test key concerns, affording (a) a novel computational  
82 approach to understand preservation bias in fossil assemblages, (b) identification of putative interactions  
83 among taxa, (c) categorization of putative interactions into ecological roles, and (d) understanding of  
84 trophodynamics over time.

## 85 86 **Results and Discussion**

87  
88 Based on consensus results from two statistical approaches commonly used to define boundaries between  
89 fossil assemblages—SHEBI (Buzas and Hayek, 1998) and ANOSIM (Clark and Warwick, 1994)  
90 (methods, Fig 1(b); S2) —we identified four distinct sub-assemblages (named A-D in decreasing order of  
91 age), which match previous biofacies identification based on paleontologically defined trophic nuclei  
92 (Devereux, 2001). Based on these results, we calculated statistically corrected pairwise correlation of  
93 abundance for all taxa in each of the four sub-assemblages, and each of the 46 groupings of 20 cm levels  
94 organized to facilitate analyses at a finer depth scale (hereafter referred to as the running time-frame  
95 analysis) (methods). These correlations, with relevant regularization, were then used to construct  
96 correlation networks, for each sub-assemblage and each component of the running time-frame analysis. In  
97 these networks, each node was a taxon and each edge between a node pair represented significant  
98 correlation and thus possible interaction (methods).

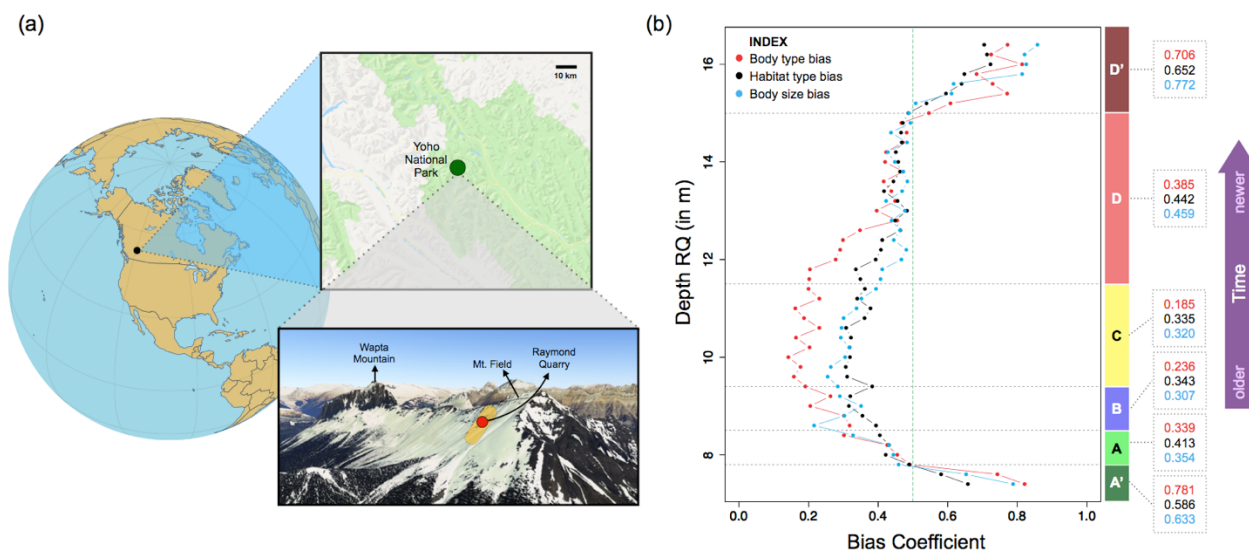

99  
 100 Figure 1: (a) Location of Raymond Quarry (RQ) (Yoho National Park, British Columbia, Canada),  
 101 denoted by red dot; yellow region denotes extent of major Burgess Shale localities; Samples were  
 102 collected from the RQ member along the 'fossil ridge' connecting Mt. Field and Wapta Mountain. (Figure  
 103 S1, methods) (b) 'Preservation bias coefficient' for body type (with respect to soft, intermediate and hard  
 104 bodied categorization) (in red), habitat type (in black) and body size categories (in blue) calculated using  
 105 networks in running timeframe analysis, plotted along with estimated boundaries for the distinct sub-  
 106 assemblages (A-D) in the 9.3 m shale section using variations of two different statistical approaches for  
 107 biofacies detection: ANOSIM and SHEBI (Figure S2, methods) and the associated average bias  
 108 coefficient for each sub-assemblage (in their respective index colors for each type of bias). The green  
 109 dotted line depicts the bias threshold we adopted for inclusion versus exclusion of sample layers.  
 110 Preservation bias coefficients exceeding 0.5 translate into substantial changes in the structure of  
 111 interaction networks calculated from abundance correlations (Figure S3b). Note that the 10 cm layers  
 112 comprising regions A' and D' were originally identified as belonging to sub-assemblages A and D, but  
 113 fossils from A' and D' were not used in the analyses presented here because of evidence for high levels of  
 114 preservation bias among taxa.

115  
 116 Correlation networks can yield insights into possible interactions among taxa (Zhang, 2011; Carr et al.,  
 117 2019; Barberán et al., 2012), but network features can be obscured by preservation and collection biases  
 118 (Dunne et al. 2008; Carr et al., 2019; Jordano, 2016). Intensive sampling and detailed annotation reduced  
 119 collection bias in this dataset, but preservation bias can still yield altered patterns of abundance. Statistical  
 120 corrections have addressed some issues of fossil preservation biases (Flannery Sutherland et al., 2019;  
 121 Starrfelt and Liow, 2016; Mitchell, 2015), but these have not targeted applications involving network  
 122 analyses.

123  
 124 Preservation bias can occur for several reasons, most notably presence/absence of hard body  
 125 parts/biomineralizable structures (which aid preservation), body size (which determines amount of  
 126 preservable material and often the size of populations), and location/habitat (which provide differential  
 127 conditions for preservation). If two taxa are both well preserved, their true abundance correlation is  
 128 expected to exhibit less noise than correlations among pairs of taxa in which at least one taxon is not well-  
 129 preserved. Differential preservation biases among taxa could introduce subtle structuring in a correlation-  
 130 based network that would be biased towards more well-preserved taxa. The network-level consequences  
 131 of such biases can be quantified by comparison with exponential random graph models (ERGMs), which  
 132 have been used to understand the effects of bias and missing data (Robins et al., 2004).

133  
134 To understand the influence of preservation bias on fossil correlation networks, we constructed an agent-  
135 based simulation model (ABM) of a complex resource-prey-predator system (consisting of 17 prey, 8  
136 predators, and a common base resource for prey; methods). We ran 1 million simulations of this ABM  
137 that differed in various initial conditions, such as starting population size of each species and average  
138 resource density. For each of the 1 million simulations, we then created 100 cases, where each of the  
139 component species was assigned independently to one of three categories differentiated by probability of  
140 preservation (methods), and also retained the corresponding base case in which each species had perfect  
141 preservation (i.e., the original abundance data). For all 101 million cases (100 million cases with modified  
142 preservation and the corresponding 1 million original cases with perfect preservation), we then calculated  
143 abundance correlations among species pairs and constructed regularized correlation networks. We  
144 formulated a bias coefficient, using ERGMs and Hamming distance, to capture the effect of differential  
145 preservation on network structure through pairwise analyses of corresponding cases with modified and  
146 perfect preservation (Figure S3, methods). Higher bias coefficients corresponded to greater alterations of  
147 network structure.

148  
149 We then applied this bias coefficient to the fossil data in the running time-frame analysis (methods). We  
150 separately considered three factors that could map onto differences in preservation: body type (hard-  
151 bodied, partially hard-bodied, soft-bodied), body size (<15cm, 15-30 cm, and > 30 cm maximum size),  
152 and habitat usage (endobenthic/epibenthic, nektobenthic and nektonic/pelagic) (methods). Information on  
153 these factors were compiled from literature surveys: body type, maximum body size, and habitat usage  
154 (see supplementary data).

155  
156 For all three factors, we found evidence for significant differential preservation bias at the start and the  
157 end of the collected assemblage in regions A' and D' that were, respectively, originally part of sub-  
158 assemblages A and D identified through biofacies detection (Figure 1(b)). Because of their heightened  
159 preservation bias, which was strong enough to substantially alter apparent network structure, data from  
160 regions A' and D' were excluded from further analyses. In contrast, we found low levels of preservation  
161 bias coefficients in each of the defined sub-assemblages (A-D), with respect to body type, body size, and  
162 habitat (Figure 1(b); bias coefficient was < 0.5 for all cases; methods). These preservation biases were  
163 low enough to have inconsequential effects on network structure (Fig. 1b, Fig. S3). One would expect  
164 heightened levels of preservation bias at the beginning and end of a fossil bed if the strata above and  
165 below the sampled assemblage did not allow proper preservation of organisms due to a change in  
166 environmental (preservation) conditions (Orr et al., 2003). From a taphonomic viewpoint, factors such as  
167 differential transport experienced between taxa and between fossil beds, the degree of time averaging, and  
168 pre-burial transport distances may shape the preservation of discoverable assemblage contents as well  
169 (Olson et al., 1980; Martin, 1999). Consequently, complete preservation of all ecological information is  
170 seldom expected (Flannery Sutherland et al., 2019; Saleh et al., 2020). However, the consistency in low  
171 preservation bias coefficient with respect to body preservation type, habitat type, and body size  
172 throughout sub-assemblages A – D (with removal of A' and D' and corresponding running time frames)  
173 suggests that the net taphonomic effect resulted in an overall relatively homogeneous burial of a group of  
174 taxa across the whole assemblage (Figure 1(b)). Nevertheless, some loss of taxa may not have been  
175 inferable from the fossil data using our methods, and small differences in preservation may still be present  
176 throughout the assemblage at the taxon level.

177  
178 Even though we report no significant preservation biases beyond those at the A' and D' ends of the RQ  
179 assemblage based on the predicted 'in-situ' preservation potential of the RQ taxa, the original interactions  
180 may still have been subjected to certain biases (Butterfield, 2003). However, these possibilities are not  
181 pertinently different than methodological biases affecting recent or extant ecological data (Dunne et al.,  
182 2008; Armitage and Jones, 2019).

183

184 Both experimental and theoretical studies predict that prey-predator abundances should be correlated on  
185 long time scales (Liebhold et al., 2004; Tobin and Bjørnstad, 2003; Blasius et al., 2019), and we found  
186 this to be true for our ABM simulations (Figure S4). This result supports the premise that fossil  
187 abundance correlations might correspond to potential species interactions, where the degree of  
188 preservation bias is low, such as in extremely well-preserved assemblages like the Burgess shale (Saleh et  
189 al., 2020), and census-like preservation of Ediacaran communities (Mitchell et al., 2019). Furthermore,  
190 the distribution of abundance correlations should characterize system-level interactions. For example, we  
191 might hypothesize that abundances of competitors should be negatively correlated whereas abundances of  
192 species engaged in highly specialized interactions should be strongly positively correlated, assuming  
193 homogeneous transport and burial. The shape and location of the distribution of fossil abundance  
194 correlations differed among sub-assemblages A-D (Figure 2 (a), (b)). In particular, the frequency of small  
195 magnitude correlations and of negative correlations increased over time from A to D.

196  
197 To explore if changes in correlational distributions represented a shift in the dominant mode of species  
198 interaction over time, we decomposed the corrected correlation distribution for each sub-assemblage A –  
199 D, which were used in network construction, into its respective basis functions using maximum likelihood  
200 (methods). In each sub-assemblage A – D, the distribution of abundance correlations was best fit by a  
201 sum of four Gaussian distributions (Figure S6, methods), and across sub-assemblages, the four Gaussians  
202 had similar means but different amplitudes and variances (Figure 2 (a)). We found a similar result for the  
203 finer scale running timeframe analysis. To categorize these Gaussians in the correlations of fossil data  
204 into possible clusters, we calculated a pairwise similarity matrix of all the component Gaussians across  
205 the assemblage and then performed a spectral analysis with the ‘gap’ statistic (Tibshirani et al., 2000;  
206 methods) on it, which revealed four clusters of Gaussians (Figure 2 (a), (b); methods).

207  
208 To understand the origins and potential meaning of the four clusters/categories of Gaussians in the  
209 empirical data, we used the ABM to simulate the dynamics of hypothetical ecological communities that  
210 differed in the importance of prey-predator interactions and competition. We considered trophic-relation-  
211 based ABM systems involving prey, specialist predators, and generalist predators, which implicitly also  
212 allow for competition and apparent competition (or, intra-guild competition). We compared where the  
213 abundance correlations associated with specialist, generalist, and competitive pairwise interactions from  
214 the simulated ABM communities fell relative to the four categories obtained via clustering from the fossil  
215 correlation distributions. Fully 86% of all correlations derived from interactions in the ABM fell within  
216 the intervals of the four empirically defined categories (Figure 2 (a), (b), (c)). In support of our initial  
217 ideas about the relationship between abundance correlation and interaction type, we found that ABM  
218 interactions involving competition and apparent competition dominate Category 1, generalist prey-  
219 predator interactions dominate Categories 2 and 3, and specialist prey-predator interactions dominate  
220 Category 4 (Figure 2 (c)). To explore, we used a second ABM in which each prey-predator interaction  
221 was weighted by the predator’s preference for that prey. From these simulations, we recovered the  
222 specialist-generalist spectrum of interactions, and further, identified a non-linear relation between a  
223 predator’s preferences for prey and the abundance correlations recovered from the ABM. The abundance  
224 correlation between a predator and its lower preference prey was weaker than that expected for the same  
225 prey unweighted by preference (Figure S4).

226  
227 With reference to the ABM results, we can interpret that ‘Category 1’ (grey) involves negative  
228 correlations suggesting competition and apparent competition interactions among taxa (Fig. 2(c), leftmost  
229 column). Alternatively, such negative correlations can also arise if species have different habitat  
230 preferences and the relative availability of different habitats changes over time. Similarly, correlations in  
231 Categories 2 (blue) and 3 (light orange) likely involve generalist consumers. If a consumer is not  
232 specializing on one resource but eats many, it will be only loosely correlated with its prey (Fig. 2c, middle  
233 columns). A weak positive correlation could also mean that both members of a species pair use similar  
234 resources. Category 4 (purple) would derive from component Gaussians that feature consistently strong,

235 positive correlations. This category likely represents specialist predation in which a predator depends  
 236 solely or very strongly on a particular prey species (Fig. 2c, rightmost column). Alternatively, if two  
 237 interacting species are strong mutualists or exhibit a strong joint dependence on environmental conditions,  
 238 similarly strong positive correlations could emerge. Please note that throughout our work, we will refer to  
 239 interactions as specialist or generalist (or competitive) without ascribing roles to particular taxa as we  
 240 cannot ascertain which species are the prey and the predator in a given pair on the basis of abundance  
 241 only. Therefore, our network is undirected.  
 242  
 243

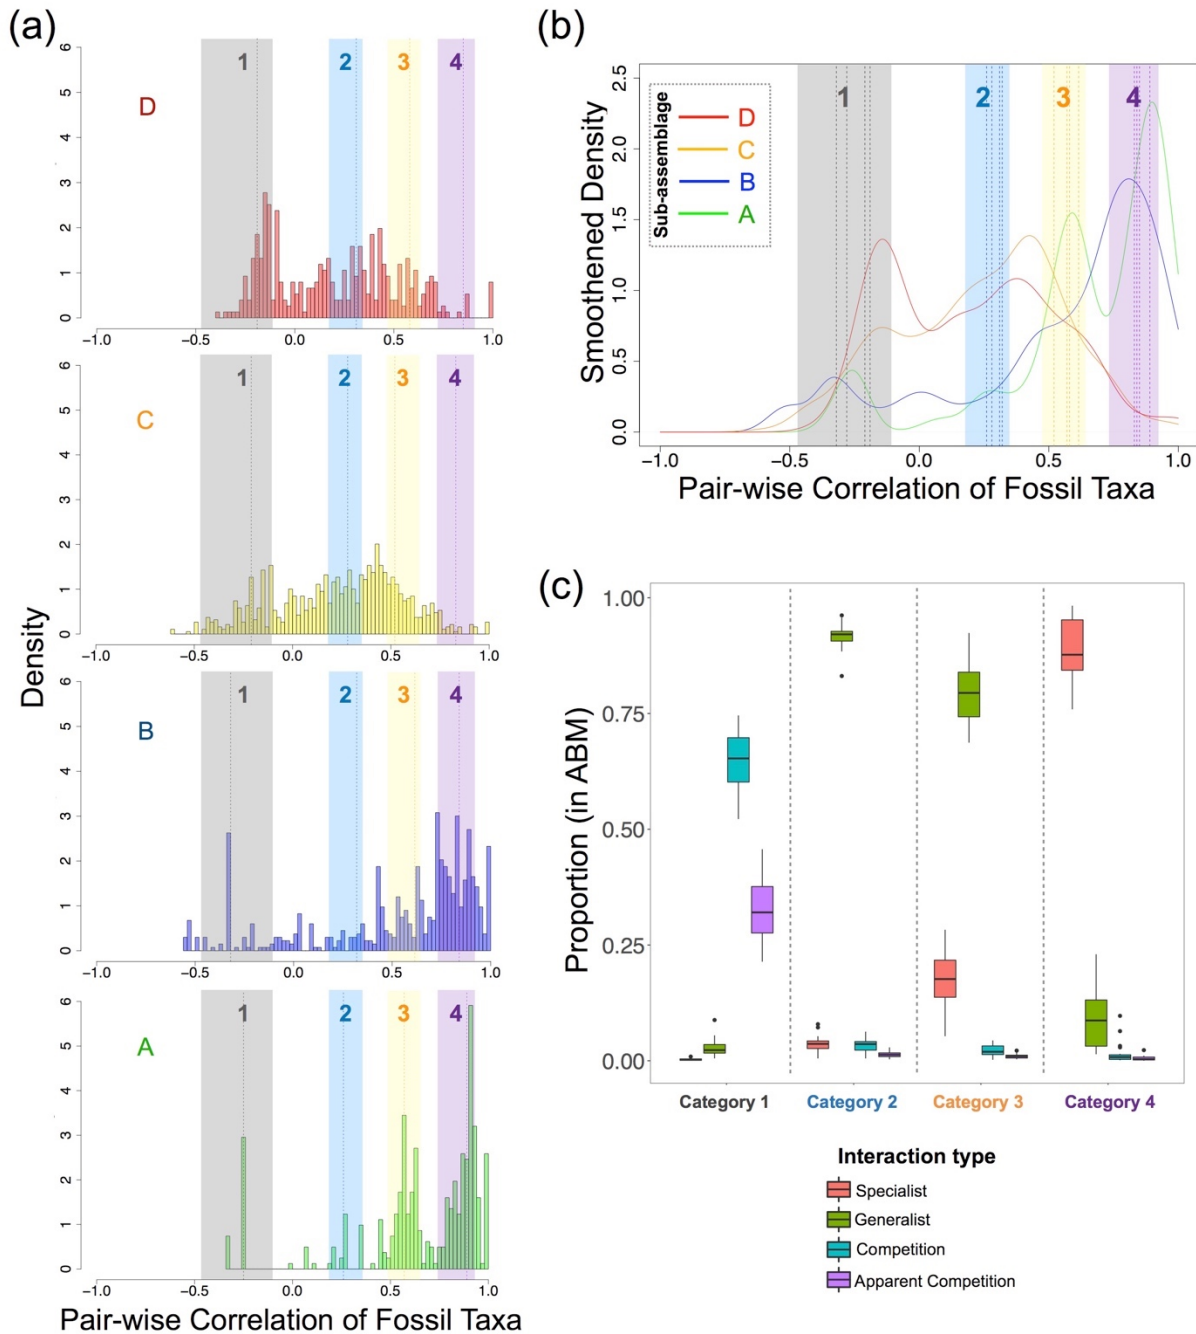

244

245 Figure 2: Characterization of interactions: (a) Distribution of pairwise correlations across A-D; dotted  
246 lines indicate the means of the basis Gaussians in each sub-assembly calculated using maximum  
247 likelihood analysis for decomposing the abundance correlation distributions; colored bands indicate the  
248 four interaction categories 1-4, which represent the range of the Gaussian means for each interaction type,  
249 clustered from the basis Gaussians of the running timeframe analysis using spectral analysis with gap  
250 statistics (see methods). (b) Summary of the four categories of interactions, calculated from spectral  
251 analysis, on the smoothed density distributions of pairwise correlation of fossils in the four sub-  
252 assemblages A-D; dotted lines indicate the means of Gaussian basis distributions from A-D; (c)  
253 Proportion of different feeding types in the ABM whose abundance correlations fall in the colored bands  
254 identified in (a), suggesting, for example, that the negative correlations in category 1 (grey) are dominated  
255 by competition and apparent competition interactions whereas the strongly positive correlations in  
256 category 4 (purple) derive from specialized interactions.

257  
258 We acknowledge that correlations may exist based on similar habitat/environment, and attempted to  
259 address this concern in three steps. First, we calculated the preservation bias for habitat (Figure 1(b)) and  
260 did not find any significant effect of habitat on the network structure. Next, to support our trophic ABM  
261 analysis as a benchmark for categorization, we tested whether two alternative reasons for correlations  
262 (i.e., habitat specializations for negative correlations, and habitat/environment sharing for positive  
263 correlations) impacted our analysis of the fossil data. To do this, we used a stochastic block model (SBM)  
264 on the sub-assemblages and on the running-time-frame data to see if the clustered distributions of  
265 interactions could be explained instead by habitat/environment and motility data hypothesized in literature  
266 (see Figure S10).

267  
268 SBMs find community structure in networks (i.e., blocks of nodes which interact more among themselves  
269 than with others outside the block), and in this application would indicate clustering of interactions based  
270 on similar habitat or motility (Karrer and Newman, 2011). To implement the SBMs, we first computed  
271 the Shannon's equitability index of each block in a given network and then calculated the weighted  
272 average of this index across blocks. An index value of 1 implies equal distribution of habitat or motility  
273 types across blocks, while a 0 indicates complete dominance of one type in a block. The SBM analyses  
274 revealed no strong dependence of the empirical correlations on either habitat or motility (Figure S10(c)).  
275

276 Lastly, to explore whether negative correlations can arise from species specializing on different habitats,  
277 we compared the frequency of negative correlations within the same habitat, to the corresponding values  
278 for different habitats. For the running time scale data, there were no more negative interactions among  
279 taxa from different habitats than from the same habitats (Pearson's  $X^2$  with Yates' continuity correction:  
280 mean p-value (across the entire running time frame analysis) = 0.89, range = [0.68,0.93]), thereby  
281 excluding any strong effect of habitat exclusivity. We found similar results for positive correlations, again  
282 finding an absence of association between interactions and species' habitat types (Pearson's  $X^2$  with  
283 Yates' continuity correction: mean p-value (for all time frame analysis) = 0.26, range = [0.19,0.35]).  
284 Collectively, these results suggest that habitat did not play a significant role in the structure, value and  
285 distribution of correlations in our network and that these correlations instead likely stem from species  
286 interactions.

287  
288 Refocusing on the distributions of correlations, we observe that across fossil sub-assemblages A-D,  
289 negative interactions increase in relative frequency over time (Figure 2 (a), (b)). Similarly, specialist and  
290 generalist interactions increased from sub-assembly A to B, but specialist interactions are largely absent  
291 in D, and occur only infrequently in C. Systematic change in the fossil transport regime could explain  
292 this, but this seems unlikely given the consistency of pairwise correlation signals over time (see fig S9).  
293 Alternatively, long term environmental change could have decreased regional productivity and made  
294 resources rare in the area of fossilization. Such long-term loss of productivity could have led to an

295 increase in competitive interactions and loss of specialist interactions (including both mutualists and  
296 trophic interactions), which are more prone to extinctions (or extirpations) (Colles et al., 2009; Ryall and  
297 Fahrig, 2006). These results contrast with previous food-web based studies, where generalists dominate  
298 early structuring of food webs, followed by specialists (Piechnik et al., 2008). As such, instead of  
299 representing colonization of new habitats, our dataset may provide a window into fluctuating ecological  
300 abundances transported locally in a near-shore habitat, which were fossilized during intermittent episodes  
301 of exceptional preservation. Although we do not know the timeframe of deposition of RQ exactly—and it  
302 might be fairly long—there are no anatomical changes observable in the fossil taxa, which are  
303 consistently present throughout the assemblage. This suggests that the assemblage remains within an  
304 ecological regime rather than reflecting evolutionary time.

305  
306 Analyses of abundance correlation networks recovered many proposed prey-predator interactions. We  
307 used the term ‘consensus interactions’ to refer to those species pairs whose abundance correlation yielded  
308 the same interaction categorization for more than 50% of the strata where the two taxa co-occurred. For  
309 species whose trophic interactions have been described or suggested in past literature and whose  
310 abundance in this dataset was sufficient for correlation analysis (Figure 3, innermost region), fully 83.5%  
311 (71 of 85) of consensus interactions predicted through our correlational analyses have been independently  
312 proposed in paleontological literature (Dunne et al., 2008; Erwin and Valentine, 2013; see methods). Our  
313 analyses supplement these expert propositions by assigning pairwise interactions into categories of prey  
314 specialization or preference by reference to correlation categories (Fig. 2). Furthermore, we propose 117  
315 new possible pairwise trophic interactions based on abundance correlations identified here. These include  
316 75 putative interactions for species whose trophic interactions were previously only partially known  
317 (Figure 3, innermost submatrix), and another 42 putative interactions involving species whose trophic  
318 interactions were not previously reported. Lastly, 18 pairwise interactions previously known from the  
319 literature could not be recovered here because the taxa involved were represented at very low densities in  
320 the fossil dataset (Fig. 3, submatrix with red background). Results in Fig. 3 only considered trophic  
321 interactions. Our correlational analyses also identified 137 possible competitive interactions for which  
322 there is no reference set because competitive interactions are more difficult to deduce from paleo-  
323 biological data (Figure S7). Certain high correlation interactions may have been mutualisms, or based on  
324 shared environmental preference, common habitat patterns, or indirect interactions, rather than being  
325 trophic in nature (Freilich et al., 2018). We searched, unsuccessfully, for a strong habitat dependence in  
326 the fossil data, but still cannot rule out any of these alternative possibilities with current data. Direct  
327 fossil evidence and further paleontological knowledge is needed to verify or explore these points.  
328



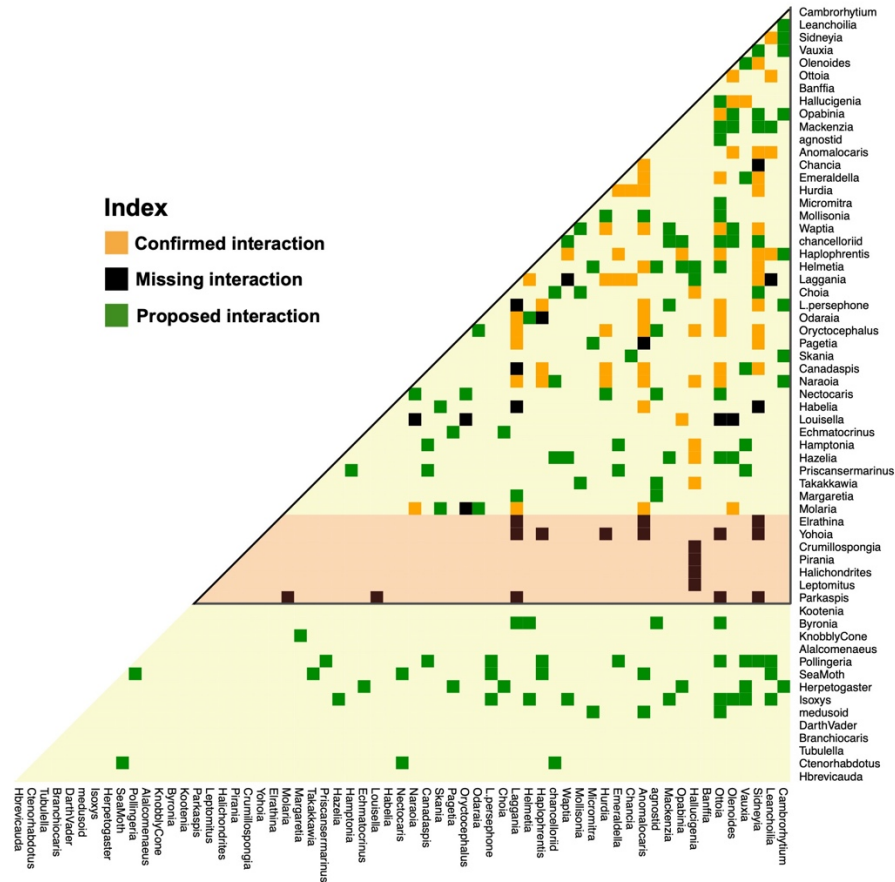

329  
330

331 Figure 3: Species interaction half-matrix showing consensus interactions from our analysis, as compared  
 332 with known trophic interactions from literature (Butterfield., 2000; Dunne et al., 2008; Erwin and  
 333 Valentine, 2013). Confirmed interactions were proposed in the literature and supported in the correlation  
 334 analyses here. Missing interactions are reported elsewhere but did not obtain any support from our  
 335 abundance correlation analyses. Proposed interactions are not currently known from the paleontological  
 336 literature but are suggested by analyses here. The subset of species interactions inside the black triangle  
 337 were posited in previous studies (Dunne et al., 2008). The species within the light orange area were  
 338 numerically rare in our dataset and no statistically robust prediction could be made regarding their  
 339 interactions. For classification of confirmed interactions, see figure S8, and for consistency of interaction,  
 340 see figure S9.

341

342 Detailed ecological analyses of correlation networks may suffer from overestimation problems (Carr et  
 343 al., 2019; Freilich et al., 2018), but broader-brush categorization of interactions based on abundance  
 344 correlations can provide novel insights into the functional characteristics of fossil assemblages. Predicted  
 345 interactions can be supplemented with interactions proposed by paleontological literature, based on gut-  
 346 contents, morphology or other analyses, to weed out false positives. Other problems raised by earlier  
 347 studies of paleo-ecological networks (Dunne et al., 2008; Roopnarine, 2010), such as whether correlations  
 348 capture long term prey-predator and population dynamics, were also explored here. We found that  
 349 abundance correlation analyses echo results concerning long-term correlations in prey-predator models  
 350 (Carr et al., 2019) and provide a strong platform for predicting species interactions without reference to  
 351 prior information concerning the incidence, intensity, or character of those interactions (Figure S4, S5).

352

353 Understanding ecological dynamics from fossil data has always been a major challenge, especially for  
354 older assemblages. The extraordinary fossil preservation of the Burgess Shale, including the novel  
355 Raymond Quarry dataset reported here, provides an exceptional window on possible ecological  
356 interactions during an era of major animal evolution. Past studies argued that many properties of modern  
357 ecosystem structure first emerged during the Cambrian (Bengston, 2002), and network analyses coupled  
358 with proposed trophic interactions highlighted aspects of food-web structure during this period (Dunne et  
359 al 2008). When sufficiently strong fossil data are available, analyses of abundance correlation networks,  
360 supplemented with models to characterize biases in preservation and interpret species interactions, can  
361 reveal unknown or difficult-to-ascertain links in fossilized ecosystems and shed light on trophodynamics  
362 over evolutionary time.

## 364 **Data and Methods**

### 365 Data Collection

366 The primary data were collected from the Raymond Quarry in the main Burgess Shale site (Figure S1),  
367 located ~5 km north of Field, British Columbia, Canada, on a ridge connecting Mt. Field and Wapta  
368 Mountain ('Fossil Ridge') (figure S1, S2). Other exposures are known (Collins et al. 1983), including  
369 outcrops on Mt. Stephen that are lithologically and biostratigraphically equivalent to the Raymond Quarry  
370 Member (Fletcher and Collins 1998), such as the outcrops of equivalent strata and fossils across the  
371 Kicking Horse Valley on the shoulder of Mt. Stephen (Fletcher and Collins 1998). Consequently, the  
372 discussed fauna was not geographically isolated. Moreover, the Raymond Quarry fauna also appears to be  
373 autochthonous.

374 Vertical bedding measurements were determined from an arbitrarily assigned RQ 10.0 m level (equivalent  
375 to 21.6 m above the base of C.D. Walcott's excavations in the Phyllopod Bed). All fossils were labelled  
376 according to the bed of occurrence, to the nearest 10cm. Specimens that occurred exactly between two  
377 measured levels were assigned to the higher level.

378 Metadata for each taxon were collected using a literature survey (see references section in  
379 'metadata\_traits.csv') for the following properties: taxonomic affiliation, habitat, size, motility and  
380 preservation potential. Taxonomic affiliation was noted only when there was a majority consensus for the  
381 affiliation across sources, otherwise these were omitted from the analysis. Size data were based on the  
382 maximum size of specimens found in literature. Motility and habitat were inferred from descriptions of  
383 each taxon's anatomical characteristics. The preservation potential assignments were primarily based on  
384 literature descriptions. Hard-bodied taxa are those with biomineralized skeletons, heavily-sclerotized  
385 parts, or decay-resistant organic cuticle. Intermediate-group taxa are those with light sclerotization or  
386 unsclerotized cuticle. Soft-bodied taxa are those with soft cellular outer layers and soft internal tissues.  
387 Enigmatic metazoans (i.e. for which we have no biomineralized/sclerotized preserved parts and have no  
388 phylum consensus) were assigned to the soft-bodied group.

### 389 Identifying sub-assemblages

390 We used ANOSIM (Analysis of Similarity: Clark, 1993; Clark and Warwick, 1994; Bonuso et al., 2002),  
391 and SHEBI (S (species richness)-H (information) -E (evenness) analysis for Biofacies Identification:  
392 Buzas and Hayek, 1998; Handley et al., 2009) to detect consensus biofacies or sub-assemblages in the  
393 sampled region. ANOSIM is a widely used non-parametric, distance-based clustering method. Based on  
394 the rank ordering of Bray-Curtis similarities (Clarke and Warwick, 1994), ANOSIM tests for differences  
395 in community structure by mixing permutation tests with a general Monte Carlo randomization approach  
396 (Hope, 1968; Clarke, 1993). SHEBI recognizes edges between samples of specimens along a (spatial or  
397 temporal) transect. It depends upon the anticipated behavior of the evenness metric, which is associated

398 with Shannon-Weaver information, as the number of samples within a single community rises (Handley  
399 et al., 2009). Here, each sample was a 10 cm layer of shale with abundance values for each taxon. Each  
400 method was conducted on 100 bootstrap simulations of abundance for each 10 cm shale layer. The  
401 consensus values from the runs, using both methods, were pooled together, and the mean was used to  
402 define the boundaries of the sub-assemblages (named A, B, C and D from oldest to youngest). ANOSIM  
403 and SHEBI were implemented using the *vegan* (Okasen et al., 2019) and *foramsv2.0-5* (Aluizio, 2015)  
404 packages in R, respectively.

#### 405 Agent based models

406 Agent based models (ABMs) provide an alternative to equation-based simulations for investigating  
407 ecological scenarios in a realistic way, along with providing an easy way to incorporate spatial  
408 dependence and heterogeneity. Properly implemented, ABMs provide results that match and complement  
409 existing ecological theories and experimental evidence (DeAngelis and Grimm, 2014; Karsai et al., 2016).  
410 This led to us to choose an ABM implementation over an equation-based implementation, for  
411 representing a simple toy model of multiple prey predator interactions. Given that we are dealing with a  
412 long term (averaged) ecological abundance dataset of multiple species, there are (i) no equivalent long  
413 term complex prey-predator census dynamics of equivalent settings, and (ii) actual prey-predator relations  
414 are can only hypothesized based on paleontological evidence (see Dunne et al., 2008), we decided to use a  
415 simple ABM implementation that would have as few assumptions as possible and at the same time, also  
416 been accepted to give dynamics that have been observed in theory and experiments of prey-predator  
417 interactions (Wilensky, 1997, Liebhold et al., 2004; Tobin and Bjørnstad, 2003; Blasius et. al., 2019).

418 This led us to use the NetLogo language (Wilensky, 1997) and extend a Lotka-Volterra prey-predator  
419 (wolf-sheep) base model in the NetLogo library, which replicates simple ecological phenomena among  
420 prey and predators (Wilensky, 1997), to create ABMs for purposes of (a) quantifying the impacts of  
421 preservation biases, (b) calculating prey-predator correlations, and (c) categorizing interactions.

422 The primary simulation involved 25 species, with 17 prey and 8 predators, and was based upon an  
423 extended implementation of the base Lotka-Volterra wolf-sheep model in the NetLogo library (Wilensky,  
424 1997). All prey fed upon a common resource, which had two parameters attached to it – rate of resource  
425 regrowth and initial density of resources (relative to the total area, which was a 500x500 grid). The  
426 resource featured an energy content, as did the prey (all prey had equal energy content for simplification).  
427 Predators were assigned either a generalist or specialist feeding style. Generalists could eat all types of  
428 prey whereas a specialist could only eat one type of prey. Energy was necessary for reproduction, and for  
429 simplicity, at each reproduction event we divided the energy between the mother and the offspring,  
430 provided that the organism had enough energy to reproduce. The rate of reproduction was controlled as a  
431 variable. One million runs of the model were conducted that involved sweeping all parameters throughout  
432 their ranges. Each model ran until it reached a stable state (only resource was left, all predators died, or all  
433 of the organisms died) or it reached 50,000 time points, whichever occurred first. Data were transferred to  
434 R for further processing using the package *RNetLogo* (Thiele, 2017). Each of these models were used as a  
435 dataset for (a) testing bias, (b) calculating prey-predator correlations, and (c) categorizing interactions.

436 The second model was the same as the first/primary model except that each predator species was  
437 randomly assigned a different preference for each prey (between 0 and 1). This preference was the  
438 probability of a predator consuming a given prey when encountered. One million runs of the model were  
439 conducted that involved sweeping all parameters throughout their ranges. Each model ran until it reached  
440 a stable state (only resource was left, all predators died, or all of the organisms died) or it reached 50,000  
441 time points, whichever occurred first. Data were transferred to R for further processing using the package  
442 *RNetLogo* (Thiele, 2017). Each of these models was then used as a dataset for categorizing interactions.

#### 443 Constructing networks

444 Fossil count data from two adjacent 10 cm layers were combined in each sub-assembly to increase  
445 species coverage for network construction. For each 20cm unit of each sub-assembly (A through D,  
446 excluding A' and D' as in Figure 1 on the basis of preservation bias), we iteratively sampled fossils using  
447 bootstrap process for 1000 iterations. Using the data for each iteration, we calculated mean correlations  
448 between distinct 20 cm blocks for each sub-assembly across all the bootstrap replicates. Given that  
449 some of these interactions can be spurious, we applied partial correlation corrections to the correlation  
450 matrices of each sub-assembly. Next, we performed a Fisher Z-transform of the partial correlation  
451 matrices and calculated the probability of observing the estimated Z-scores by chance (based on a  
452 normally distributed null distribution). Finally, we used the Benjamini-Hochberg correction of p-values to  
453 eliminate those interactions whose corrected correlation p-values exceeded 0.01. This yielded the final set  
454 of high-fidelity interactions for each sub-assembly.

455 We also created networks on a running time-frame basis where we started at the beginning of the  
456 assemblage and repeated the process of network construction as described above for all possible 1.2 m  
457 sub-sections created by shifting the analysis frame in 20cm increments.

458 Pair-wise correlations were calculated for each dataset of the agent-based model simulations and across  
459 differently sized time steps as slices for calculating correlations (data were aggregated for each slice) (see  
460 Figure S2). We took 100 time-steps as the benchmark for each time slice for constructing networks for all  
461 purposes as the correlation saturated at a high enough value and the effects of phase difference and noise  
462 were reduced at this time scale of simulations.

#### 463 Testing Preservation Bias using Exponential Random Graph Models

464 Exponential Random Graph Models (ERGMs: Holland and Leinhardt, 1981) are a preferred tool for  
465 evaluating how individual variables shape network structures. ERGMs have been used in the past to look  
466 at missing data and bias (Robins et al., 2004). We used the *ergm* (Handcock et al., 2019) package in R.

467 Using the trophic ABM datasets, we assigned each species in each simulated dataset to one of three  
468 preservation categories ( $\alpha$ ,  $\beta$ , or  $\gamma$ ) to create a new 'partially preserved' dataset whose abundance values  
469 were adjusted downward by fixed preservation probabilities where

$$470 \quad 1 \geq P(\alpha) \geq P(\beta) \geq P(\gamma) \geq 0$$

471 These three categories can be thought of differential preservation categories: for example, in case of body  
472 type: hard bodied (preserves well like  $\alpha$ ), intermediate bodied (preserves decently but less than hard body,  
473 like  $\beta$ ) and soft bodied (preserves poorly as compared to other body types; can be denoted by  $\gamma$ ).

474 We repeated this procedure 100 times each for all 1 million simulated datasets and then constructed  
475 corresponding networks for each of the original and partially preserved datasets. For each of these  
476 constructed networks (both altered/partially preserved and original), we calculated the dependence of the  
477 network structure on the preservation category ( $\alpha$ ,  $\beta$  or  $\gamma$ ) using ERGMs. We calculated the p-value  
478 resulting from the ERGM model for both the altered (partially preserved) networks and the original  
479 (intact) networks, as well as their mutual Hamming distance.

480 The bias coefficient ( $B$ ) is measured in terms of these ERGM p-values of the original and partially  
481 preserved networks ( $p_{original}$  and  $p_{partially\ preserved}$  respectively) as

482

$$B = \frac{p_{original} - p_{partially\ preserved}}{p_{original}}$$

483  $B > 0.5$  on this scale corresponds to a change of  $\sim 0.2$  of Hamming distance (Figure S3). Note that the  
484 ABM simulations were used to validate this statistical method before we applied it to the fossil data.

485 Moreover, this framework can detect biases in network structure based on categorizations, even when the  
486 relative preservation potentials among the categories is unknown, but only the categorizations are known.  
487 This is a useful property because, although we can assign relative ease of preservation in categorizations  
488 of say, body type – assigning the same for habitat and body size might be more complex (see  
489 supplementary file ‘metadata\_traits.csv’).

490 Using this framework, we calculated ERGM p-values for each of the networks from the running time-  
491 frame analysis, as well as the four sub-assemblages (A-D) of the fossil data. Because we do not have the  
492 structure for the unaltered network of the fossil data (i.e. the actual abundance correlation networks from  
493 when the burial happened), we assume  $p_{original} = 1.0$  for these analyses, in order to calculate the bias  
494 coefficient. This assumption gives an upper bound on the bias coefficient for our data, as the minimum  
495 possible ERGM p-value would be represented by  $p_{original} = 1.0$  scenario (i.e. no dependence of  
496 network structure on any factor), but the actual p-value would usually be lower than this assumed value.  
497 As, all reported bias coefficients for the fossil data is based on this assumption, they represent the ‘worst-  
498 case’ values.

499 We performed three sets of analysis in this regard: body type, body size, and habitat affiliation. In each  
500 set, there were three categories, which were pre-determined (see supplementary file ‘metadata\_traits.csv’  
501 for details), according to available paleontological evidence. The body type categorizations were based on  
502 preservation or fossilization potential, as described in ‘Data collection’ sub-section of Methods – namely,  
503 hard bodied, soft bodied and intermediate, based on literature descriptions. Body size categorizations  
504 were  $< 15$  cm,  $15 - 30$  cm,  $> 30$  cm maximum size. Habitat types were categorized into  
505 endobenthic/epibenthic, nekto-benthic, nektonic/pelagic, based on literature survey (see references section  
506 in ‘metadata\_traits.csv’).

#### 507 Categorization of interactions and comparison with ABM

508 We subjected the distributions of abundance correlations to a maximum likelihood analysis to identify  
509 appropriate Gaussian basis functions. The mean, and standard deviation for a pre-defined number of  
510 Gaussian basis functions were determined using a general simplex-based optimization algorithm (Nelder  
511 and Mead 1965). We compared results assuming 1 through 6 possible Gaussian basis functions and  
512 identified the optimal number of such functions for the correlation data using the likelihood-ratio test. All  
513 the scripts were implemented in R.

514 Once the number and nature of the Gaussians were estimated (for sub-assemblages A-D and for the  
515 running time-frame analysis), we used pairwise Kolmogorov-Smirnov (KS) tests between basis Gaussians  
516 to obtain a pairwise similarity matrix. The number of clusters of Gaussian basis functions was determined  
517 using spectral analysis based on the pairwise similarity matrix obtained from KS analysis and the gap  
518 statistic (Tibshirani et al., 2000). An advantage of using the gap statistic is that it does not pre-assume the  
519 number of required clusters (Tibshirani et al., 2000). All scripts were implemented in R using the package  
520 *cluster*. Four zones of clustering were determined using this method and are termed categories of  
521 interactions. Each category is shown in Figure 2 (a) using the range of all associated Gaussian means.

522 Next, from the ABM datasets, we identified the nature (i.e., generalist-prey, specialist-prey, competition,  
523 apparent competition) of all interactions whose partial correlations fell within ranges of the Gaussian  
524 mean clusters and plotted their relative occurrences in Figure 2c.

525 Consensus interactions were calculated from the running time-frame analysis and were defined as the  
526 high-fidelity interactions (or statistically corrected correlations) that stayed in the same interaction  
527 category for more than 50% of the time it occurred for a given pair of taxa. These results have been  
528 plotted in figures 3, S8 and S9.

529

### 530 Stochastic Block Models (SBMs) and Equitability analysis

531 The stochastic block model (SBM) is a tool, used to detect community structure in a network, where  
532 communities can be defined as multi-node subcomponents (or, blocks) of the network in which edges are  
533 more common within than between communities (Karrer and Newman, 2011).

534 We applied the framework of SBMs to the networks constructed from fossil data to understand the  
535 associations among species. In particular, we sought to understand whether the correlations on which  
536 those networks were built represented shared motility or habitat variables rather than species interactions.  
537 At each network level (which were calculated at a sub-assemblage level A-D and also at a fine time scale  
538 level), we used integrated classification likelihood (ICL) to calculate the number of clusters/blocks. On  
539 each block/cluster, we annotated the taxa in those blocks using the metadata on habitat and motility  
540 (separately; see supplementary file ‘metadata\_traits.csv’ for details) and used the *mixer* package  
541 (Latouche et al., 2012) to find the distribution of annotated categories across blocks at a given network  
542 level. In order to numerically represent it, we calculated Shannon’s equitability index (SEI), which is the  
543 normalized Shannon’s diversity coefficient, based on the categories of habitat/motility for each  
544 block/cluster – and to estimate a network level (for a sub-assemblage/fine time scale analysis) average –  
545 we found the weighted average (on basis on number of taxa in each block/cluster) of SEI over all the  
546 blocks/clusters in the given network. We then plotted this average network SEI value at the fine scale  
547 analysis level in Figure S10(c).

548 SEI points at the dominance of a specific type of say, habitat/motility, on the taxa involved in interactions  
549 within a calculated cluster. If a given cluster is highly dominated by a single type of habitat/motility, SEI  
550 would be very low and would be 0 if it is only type. As SEI is normalized diversity index, the highest  
551 possible value of 1 occurs when all the types are equally probable. This is not the case with our fossil data  
552 – and hence, we calculated the maximum empirical value possible with the data (Figure S10(c)) for both  
553 habitat and motility separately. In addition, to make sense of how biased the correlational values are, we  
554 calculated the SEIs, for both habitat and motility, where a dominant type is equal to 95% of a given  
555 cluster and others are equally distributed in the remaining fraction (Figure S10(c)).

556

### 557 **Data availability**

558 All relevant data needed to recreate the results are provided as supplementary material. Abundance values  
559 for all the taxa at 10 cm resolution in RQ can be found in ‘abundance\_data.csv’; ecological habits,  
560 taxonomic affinity, body type categorization and size metadata for all the taxa can be found in  
561 ‘metadata\_traits.csv’. Relevant final data are also provided for reference –  
562 ‘trophic\_interaction\_matrix.csv’ contains the consensus trophic interactions, and  
563 ‘competitive\_interaction\_matrix.csv’ contains the consensus competitive/negative interactions. Simplified

564 ABM simulation and network analysis code can be found at: [github.com/anshuman21111/cambrian-](https://github.com/anshuman21111/cambrian-fossil-networks)  
565 fossil-networks.

## 566 Acknowledgements

567 We thank Nicholas J Butterfield, Phillip Staniczenko, Jennifer Dunne, Michelle Girvan, Hector Corrada-  
568 Bravo, Tracy Chen, Sushant Patkar, Roozbeh Bassirian, Doug Erwin, Philip Johnson and Jake Weissman  
569 for their helpful suggestions and discussions. We acknowledge help from Jack O Shaw in collecting some  
570 of the metadata for our analysis. A.S.'s contribution to this research was supported in part by NSF award  
571 DGE-1632976.

572

## 573 References

- 574 1. Aluizio R. (2015). forams: Foraminifera and Community Ecology Analyses. R package version  
575 2.0-5. <https://CRAN.R-project.org/package=forams>
- 576 2. Armitage, D. W., & Jones, S. E. (2019). How sample heterogeneity can obscure the signal of  
577 microbial interactions. *The ISME journal*, 13(11), 2639-2646.
- 578 3. Barberán, A., Bates, S. T., Casamayor, E. O., & Fierer, N. (2012). Using network analysis to  
579 explore co-occurrence patterns in soil microbial communities. *The ISME journal*, 6(2), 343.
- 580 4. Bascompte J (2010), "Structure and Dynamics of Ecological Networks", *Science* 329:5993, pp.  
581 765-766
- 582 5. Bengtson, S. (2002). Origins and early evolution of predation. *The Paleontological Society*  
583 *Papers*, 8, 289-318.
- 584 6. Blasius, B., Rudolf, L., Weithoff, G., Gaedke, U. and Fussmann, G.F., 2019. Long-term cyclic  
585 persistence in an experimental predator-prey system. *Nature*, pp.1-5.
- 586 7. Butterfield, N. J. (2003). Exceptional fossil preservation and the Cambrian explosion. *Integrative*  
587 *and Comparative Biology*, 43(1), 166-177.
- 588 8. Buzas, M. A., & Hayek, L. A. C. (1998). SHE analysis for biofacies identification. *Journal of*  
589 *Foraminiferal Research*.
- 590 9. Carbone, C., & Narbonne, G. M. (2014). When Life Got Smart: The Evolution of Behavioral  
591 Complexity Through the Ediacaran and Early Cambrian of NW Canada. *Journal of Paleontology*,  
592 88(02), 309-330.
- 593 10. Carr, A., Diener, C., Baliga, N. S., & Gibbons, S. M. (2019). Use and abuse of correlation  
594 analyses in microbial ecology. *The ISME journal*, 13(11), 2647-2655.
- 595 11. Clarke, K. R., & Warwick, R. M. (1994). Similarity-based testing for community pattern: the  
596 two-way layout with no replication. *Marine Biology*, 118(1), 167-176.
- 597 12. Caron, J. B., Gaines, R. R., Aria, C., Mángano, M. G., & Streng, M. (2014). A new phyllopod  
598 bed-like assemblage from the Burgess Shale of the Canadian Rockies. *Nature Communications*,  
599 5, 3210.
- 600 13. Colles, A., Liow, L. H., & Prinzing, A. (2009). Are specialists at risk under environmental  
601 change? Neocological, paleoecological and phylogenetic approaches. *Ecology letters*, 12(8),  
602 849-863.
- 603 14. Conway Morris S (1986) The community structure of the Middle Cambrian Phyllopod Bed  
604 (Burgess Shale). *Palaeontology* 29: 423-467.
- 605 15. Conway Morris, S. (1989). Burgess Shale faunas and the Cambrian explosion. *Science*,  
606 246(4928), 339-346.
- 607 16. Delmas E, Besson M, Brice M H, Burkle L A, Dalla Riva G V, Fortin M J, Gravel D, Guimarães  
608 Jr P R, Hembry D H, Newman E A, Olesen J M (2017), "Analysing ecological networks of  
609 species interactions" *Biological Reviews*

- 610 17. Devereux, M. G. (2001). Palaeoecology of the Middle Cambrian Raymond Quarry Fauna,  
611 Burgess Shale, British Columbia.
- 612 18. Dormann, C. F., Fründ, J., & Schaefer, H. M. (2017). Identifying causes of patterns in ecological  
613 networks: opportunities and limitations. *Annual Review of Ecology, Evolution, and Systematics*,  
614 48, 559-584.
- 615 19. Dunne J A, Williams R J, Martinez N D, Wood R A & Erwin D H (2008) "Compilation and  
616 network analyses of Cambrian food webs" *PLoS Biology* 6(4), e102
- 617 20. Dunne J A, Labandeira C C and Williams R J (2014) "Highly resolved early Eocene food webs  
618 show development of modern trophic structure after the end-Cretaceous extinction" *Proceedings*  
619 *of the Royal Society of London B: Biological Sciences* 281(1782), 20133280.
- 620 21. Erwin, D. H., Laflamme, M., Tweedt, S. M., Sperling, E. A., Pisani, D., & Peterson, K. J. (2011).  
621 The Cambrian conundrum: early divergence and later ecological success in the early history of  
622 animals. *Science*, 334(6059), 1091-1097.
- 623 22. Erwin, D. H., & Valentine, J. W. (2012). The Cambrian explosion: the construction of animal  
624 biodiversity. *Roberts*.
- 625 23. Flannery Sutherland, J. T., Moon, B. C., Stubbs, T. L., & Benton, M. J. (2019). Does exceptional  
626 preservation distort our view of disparity in the fossil record? *Proceedings of the Royal Society B*,  
627 286(1897), 20190091.
- 628 24. Freilich, M.A., Wieters, E., Broitman, B.R., Marquet, P.A. and Navarrete, S.A., (2018). Species  
629 co-occurrence networks: Can they reveal trophic and non-trophic interactions in ecological  
630 communities?. *Ecology*, 99(3), pp.690-699.
- 631 25. Handcock, M., Hunter, D., Butts, C., Goodreau, S., Krivitsky, P., and Morris, M. (2019). *ergm*:  
632 Fit, Simulate and Diagnose Exponential-Family Models for Networks\_. The Statnet Project  
633 (<https://statnet.org>). R package version 3.10.4. <https://CRAN.R-project.org/package=ergm>.
- 634 26. Ings, T.C., Montoya, J.M., Bascompte, J., Blüthgen, N., Brown, L., Dormann, C.F., Edwards, F.,  
635 Figueroa, D., Jacob, U., Jones, J.I. and Lauridsen, R.B., 2009. Ecological networks—beyond food  
636 webs. *Journal of Animal Ecology*, 78(1), pp.253-269.
- 637 27. Jordano, P., (2016). Sampling networks of ecological interactions. *Functional Ecology*, 30(12),  
638 pp.1883-1893.
- 639 28. Karrer, Brian, and Mark EJ Newman. "Stochastic blockmodels and community structure in  
640 networks." *Physical review E* 83, no. 1 (2011): 016107.
- 641 29. Kidwell, S. M., Bosence, D. W., Allison, P. A., & Briggs, D. E. G. (1991). Taphonomy and time-  
642 averaging of marine shelly faunas. *Taphonomy: releasing the data locked in the fossil record*.  
643 Plenum, New York, 115-209.
- 644 30. Koch C (1978), "Bias in the published fossil record" *Paleobiology*,4:3, pp. 367-372
- 645 31. Latouche, P., Birmelé, E. and Ambroise, C. (2012), *Variational Bayesian inference and*  
646 *complexity control for stochastic block models*. *Statistical Modelling*, SAGE Publications, 12, 1,  
647 93-115.
- 648 32. Lau M K, Borrett S R, Baiser B, Gotelli N J, and Ellison A M (2017), "Ecological network  
649 metrics: opportunities for synthesis", *Ecosphere* 8:8, e01900
- 650 33. Lee, Michael SY, Julien Soubrier, and Gregory D. Edgecombe. "Rates of phenotypic and  
651 genomic evolution during the Cambrian explosion." (2013). *Current Biology* 23, no. 19: 1889-  
652 1895.
- 653 34. Liebhald, A., Koenig, W. D., & Bjørnstad, O. N. (2004). Spatial synchrony in population  
654 dynamics. *Annu. Rev. Ecol. Evol. Syst.*, 35, 467-490.
- 655 35. Mángano, M. G., & Buatois, L. A. (2014). Decoupling of body-plan diversification and  
656 ecological structuring during the Ediacaran–Cambrian transition: evolutionary and geobiological  
657 feedbacks. *Proceedings of the Royal Society B: Biological Sciences*, 281(1780), 20140038.
- 658 36. Martin, R.E., 1999. *Taphonomy: a process approach* (Vol. 4). Cambridge University Press.



- 659 37. Mitchell, E.G., Harris, S., Kenchington, C.G., Vixseboxse, P., Roberts, L., Clark, C., Dennis, A.,  
660 Liu, A.G. and Wilby, P.R., 2019. The importance of neutral over niche processes in structuring  
661 Ediacaran early animal communities. *Ecology letters*, 22(12), pp.2028-2038.  
662 38. Mitchell, E.G. and Butterfield, N.J., “Spatial analyses of Ediacaran communities at Mistaken  
663 Point”. *Paleobiology* (2018), 44(1), pp.40-57.  
664 39. Mitchell, J. S. (2015). Preservation is predictable: quantifying the effect of taphonomic biases on  
665 ecological disparity in birds. *Paleobiology*, 41(2), 353-367.  
666 40. Muscente, A.D., Bykova, N., Boag, T.H., Buatois, L.A., Mángano, M.G., Eleish, A., Prabhu, A.,  
667 Pan, F., Meyer, M.B., Schiffbauer, J.D. and Fox, P., “Ediacaran biozones identified with network  
668 analysis provide evidence for pulsed extinctions of early complex life”. *Nature communications*  
669 (2019): 10(1), pp.1-15.  
670 41. Muscente A D, Prabhu A, Zhong H, Eleish A, Meyer M B, Fox P, Hazen R M, and Knoll A H.  
671 "Quantifying ecological impacts of mass extinctions with network analysis of fossil  
672 communities." *Proceedings of the National Academy of Sciences* (2018): 201719976.  
673 42. Nelder, J. A. and Mead, R. (1965). A simplex algorithm for function minimization. *Computer*  
674 *Journal*, 7, 308–313  
675 43. Oksanen, J., Blanchet, F.G., Friendly, M., Kindt, R., Legendre, P., McGlenn, D., Minchin, P.R.,  
676 O'Hara, R.B., Simpson, G.L., Solymos, P., Stevens, M.H.H., Szoecs, E. and Wagner, H. (2019).  
677 *vegan: Community Ecology Package*. R package version 2.5-6. [https://CRAN.R-](https://CRAN.R-project.org/package=vegan)  
678 [project.org/package=vegan](https://CRAN.R-project.org/package=vegan)  
679 44. Olson, E.C., Behrensmeyer, A.K. and Hill, A.P., 1980. Taphonomy: its history and role in  
680 community evolution. *Fossils in the making: vertebrate taphonomy and paleoecology*, pp.5-19.  
681 45. Orr, P. J., Benton, M. J., & Briggs, D. E. (2003). Post-Cambrian closure of the deep-water slope-  
682 basin taphonomic window. *Geology*, 31(9), 769-772.  
683 46. Paine R T (1969). “The *Pisaster-Tegula* interaction: prey patches, predator food preference, and  
684 intertidal community structure”, *Ecology* 50, pp. 950–961  
685 47. Piechnik, D.A., Lawler, S.P. and Martinez, N.D., 2008. Food-web assembly during a classic  
686 biogeographic study: species’ “trophic breadth” corresponds to colonization order. *Oikos*, 117(5),  
687 pp.665-674.  
688 48. Poisot T, Stouffer D B, and Kefi S (2016), “Describe, understand and predict: Why do we need  
689 networks in ecology?” *Functional Ecology* 30, pp. 1878–1882  
690 49. Robins, G., Pattison, P., & Woolcock, J. (2004). Missing data in networks: exponential random  
691 graph (p\*) models for networks with non-respondents. *Social Networks*, 26(3), 257-283.  
692 50. Roopnarine P D, Angielczyk K D, Wang S C and Hertog R (2007) “Trophic network models  
693 explain instability of Early Triassic terrestrial communities”, *Proceedings of the Royal Society of*  
694 *London B: Biological Sciences*, 274(1622), pp. 2077-2086.  
695 51. Roopnarine, P. D. (2010). Networks, extinction and paleocommunity food webs. *The*  
696 *Paleontological Society Papers*, 16, 143-161.  
697 52. Ryall, K. L., & Fahrig, L. (2006). Response of predators to loss and fragmentation of prey  
698 habitat: a review of theory. *Ecology*, 87(5), 1086-1093.  
699 53. Saleh, F., Antcliffe, J.B., Lefebvre, B., Pittet, B., Laibl, L., Peris, F.P., Lustri, L., Gueriau, P. and  
700 Daley, A.C., 2020. Taphonomic bias in exceptionally preserved biotas. *Earth and Planetary*  
701 *Science Letters*, 529, p.115873.  
702 54. Seilacher, A., Buatois, L. A., & Mángano, M. G. (2005). Trace fossils in the Ediacaran–Cambrian  
703 transition: behavioral diversification, ecological turnover and environmental shift.  
704 *Palaeogeography, Palaeoclimatology, Palaeoecology*, 227(4), 323-356.  
705 55. Smith A B (2001), “Large-scale heterogeneity of the fossil record: implications for Phanerozoic  
706 biodiversity studies”, *Proceedings of the Royal Society of London B: Biological Sciences*, 365,  
707 pp. 351-367

- 708 56. Starrfelt, J., & Liow, L. H. (2016). How many dinosaur species were there? Fossil bias and true  
709 richness estimated using a Poisson sampling model. *Philosophical Transactions of the Royal*  
710 *Society B: Biological Sciences*, 371(1691), 20150219.
- 711 57. Thiele J.C. (2017). RNetLogo: Provides an Interface to the Agent-Based Modelling Platform  
712 'NetLogo'. R package v.1.0-4. <https://cran.r-project.org/package=RNetLogo>
- 713 58. Tobin, P. C., & Bjørnstad, O. N. (2003). Spatial dynamics and cross-correlation in a transient  
714 predator–prey system. *Journal of Animal Ecology*, 72(3), 460-467.
- 715 59. Tibshirani, R., Walther, G., & Hastie, T. (2001). Estimating the number of clusters in a data set  
716 via the gap statistic. *Journal of the Royal Statistical Society: Series B (Statistical Methodology)*,  
717 63(2), 411-423.
- 718 60. Vannier, J., & Chen, J. (2005). Early Cambrian food chain: new evidence from fossil aggregates  
719 in the Maotianshan Shale biota, SW China. *Palaios*, 20(1), 3-26.
- 720 61. Zhang, W. (2011). Constructing ecological interaction networks by correlation analysis: hints  
721 from community sampling. *Network Biology*, 1(2), 81.
- 722  
723  
724  
725  
726  
727  
728

729 **Supplementary Materials**  
730

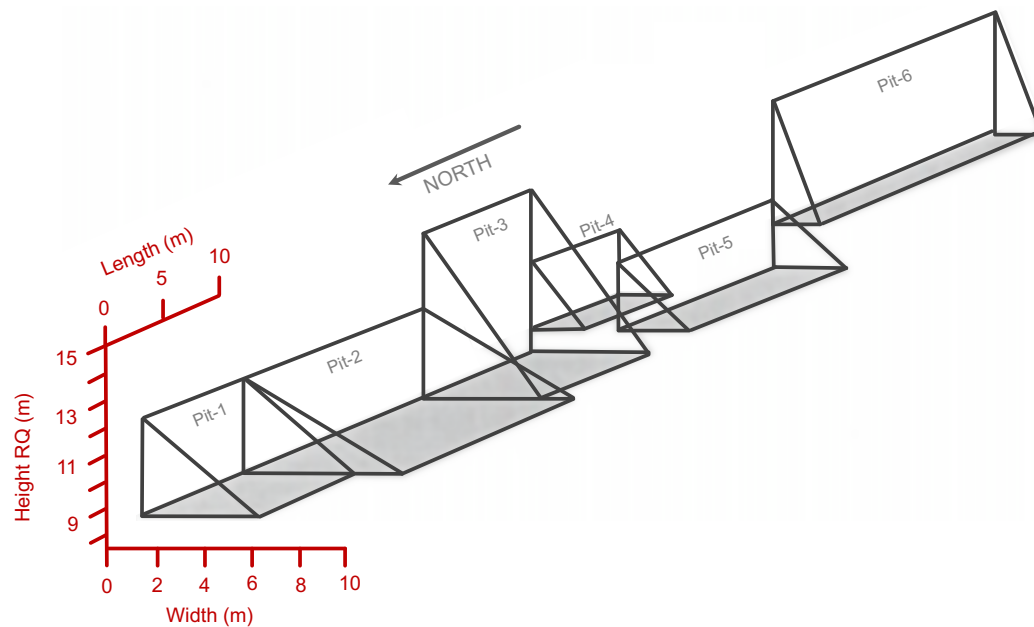

731  
732 Figure S1: Schematic of excavations in the Raymond Quarry Member. The original Raymond Quarry was  
733 located within Pit #5. The northernmost extent of Pit # 1 is 23 m south of the Cathedral Escarpment.  
734

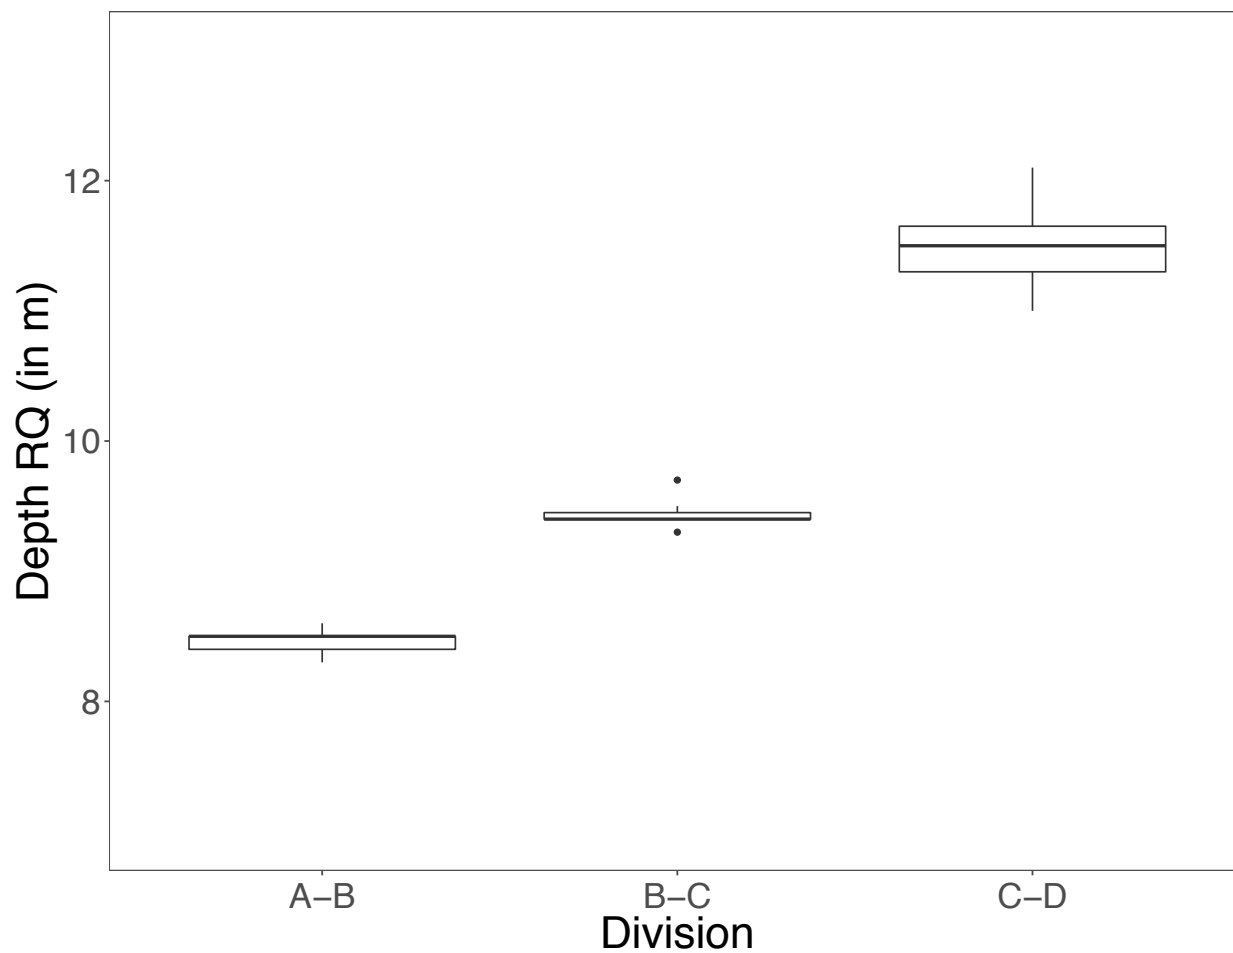

735  
736 Figure S2: Biofacies detected using consensus of statistical methods ANOSIM and SHEBI for the  
737 boundaries between the Raymond Quarry sub-assemblages A-B, B-C, and C-D.  
738  
739

740

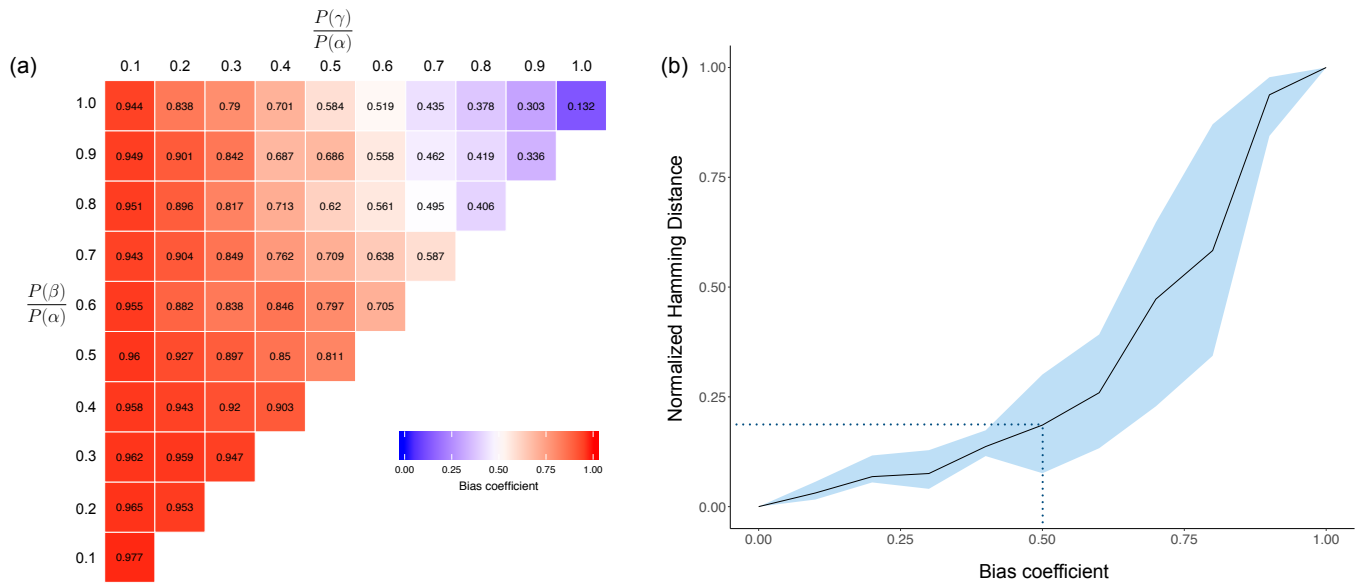

741

742

743

744

745

746

747

748

Figure S3: Preservation Bias: (a) Plot of bias coefficient as measured from the agent-based model for three categories of preservation probability:  $\alpha$ ,  $\beta$  and  $\gamma$ ; (b) Differences between networks quantified using the Hamming distance (larger values imply greater deviation) as a function of the bias coefficient. The plot compares unaltered ABM networks with ABM networks whose structure was obscured by preservation biases; standard errors are calculated across alternative ABM simulations. Note the nonlinear dependence of Hamming distance on bias that increases steeply beyond bias coefficient of  $\sim 0.50$ .

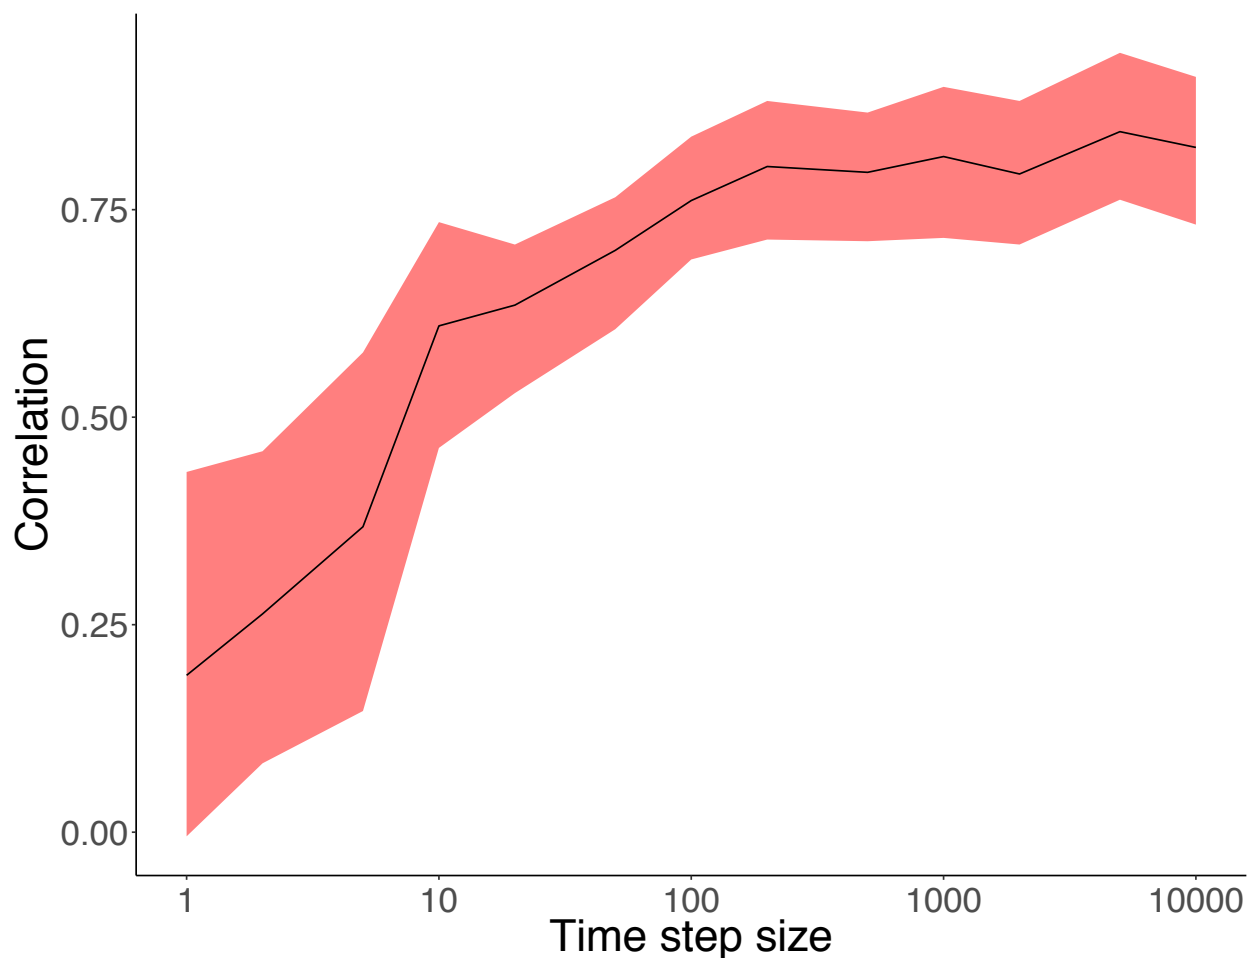

749  
750  
751 Figure S4: Correlation between a prey and its specialist predator in ABM output based on 10 sampled  
752 population sizes separated by the specified time steps. The cloud of standard error values was calculated  
753 using all the ABM runs with different initial conditions. Each ABM simulation was taken as a separate  
754 dataset and the correlation was calculated for each pair of prey and specialist predators in all the datasets.  
755 Increasing the number of sampled counts used to calculate the correlation substantially decreases the  
756 width of the error cloud.  
757

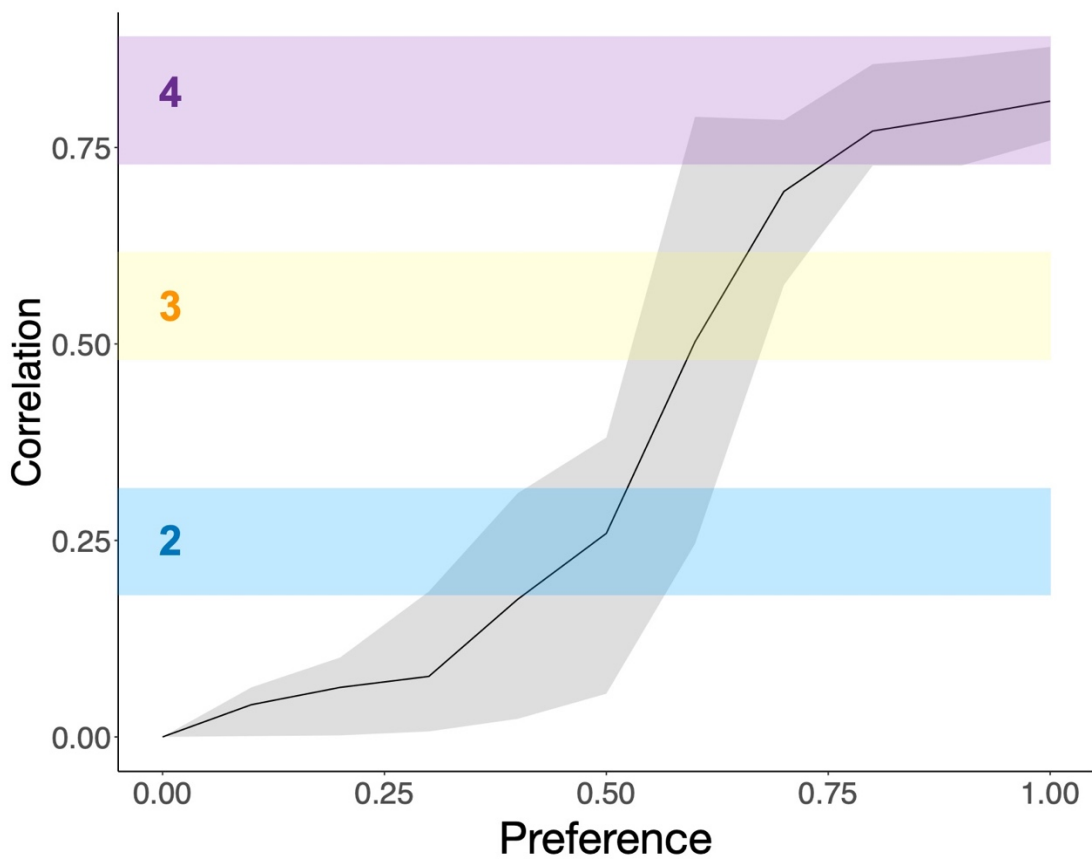

758  
759 Figure S5: Correlation change and preference/affinity for prey in an ABM with standard error (run for  
760 10,000 different ABM scenarios). Mapped onto the correlation axis are the three trophic interaction  
761 categories 2, 3, and 4 from the spectral analysis.  
762

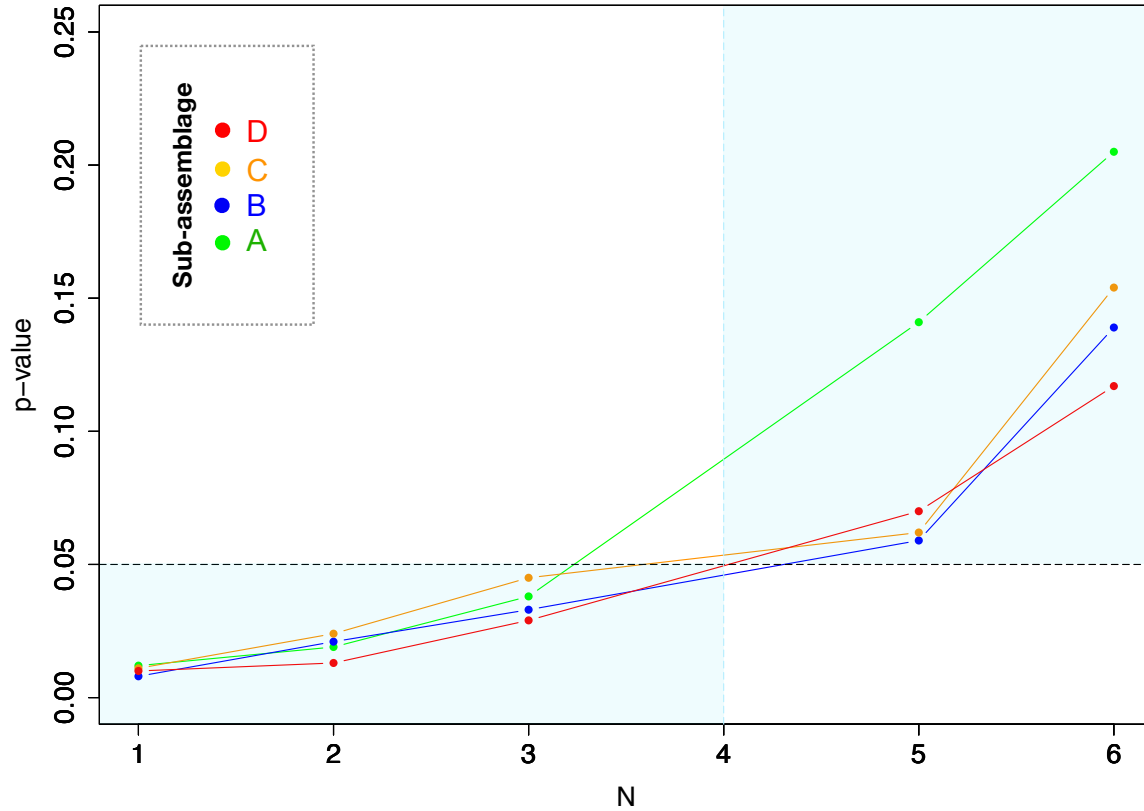

763  
764 Figure S6: p-values from chi-square test of likelihood ratio tests for nested models that differ in the  
765 number of Gaussians (N) as compared with a model with 4 Gaussians (for sub-assemblages A-D). The  
766 areas highlighted in light blue signify where the model with four Gaussians performs significantly better.  
767 All the points for all sub-assemblages lie in the region implying that a model with four basis Gaussians is  
768 the best model to pick.  
769



770

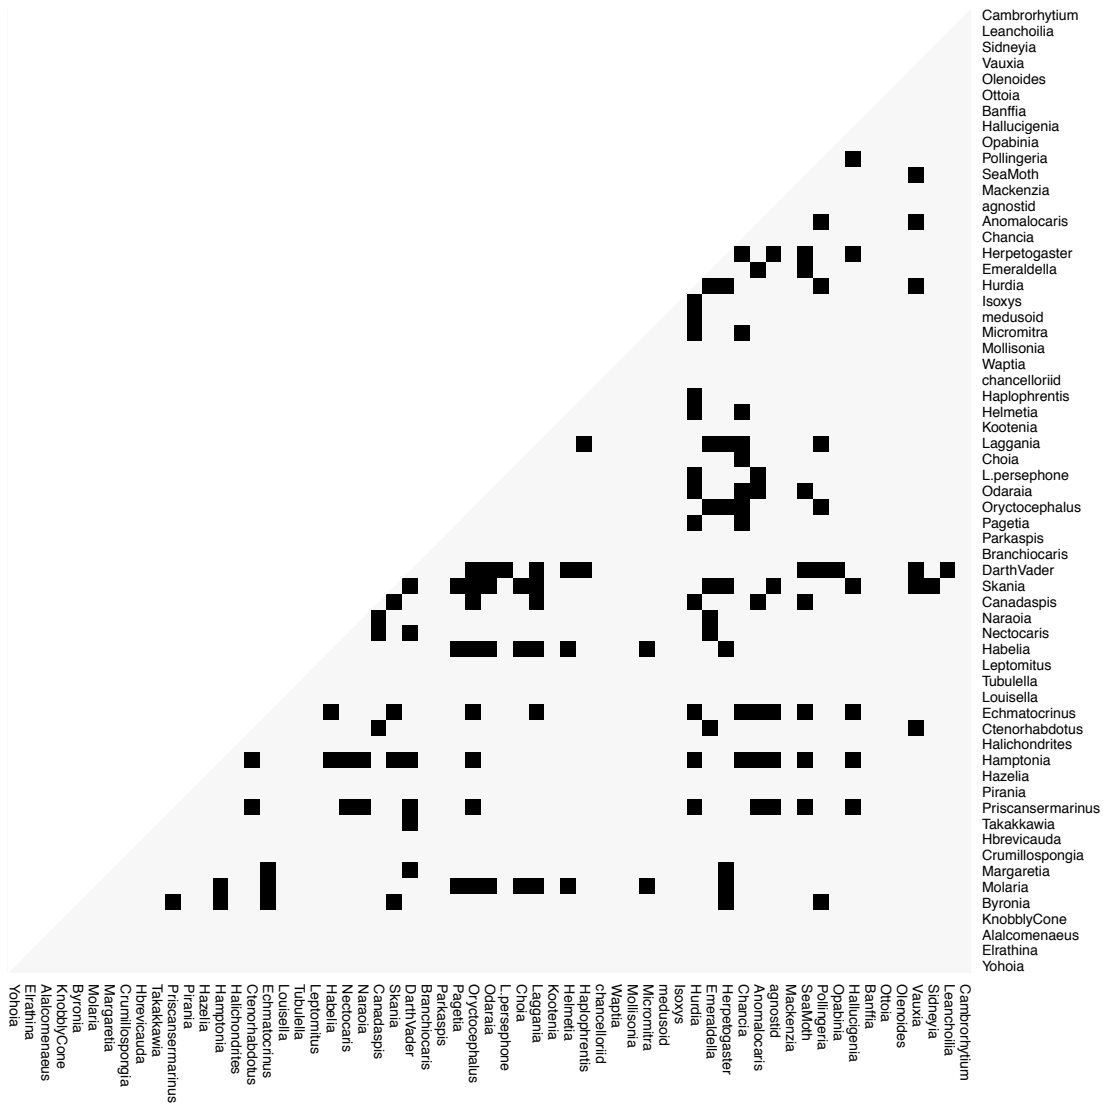

771  
772  
773  
774  
775  
776

Figure S7: Species interaction half-matrix representing competitive interactions among the fossil taxa proposed on the basis of abundance correlation network analyses. As it is more difficult to test competitive interactions through anatomical or other paleo-ecological evidence, we did not pursue these further, instead focused only on trophic interactions.

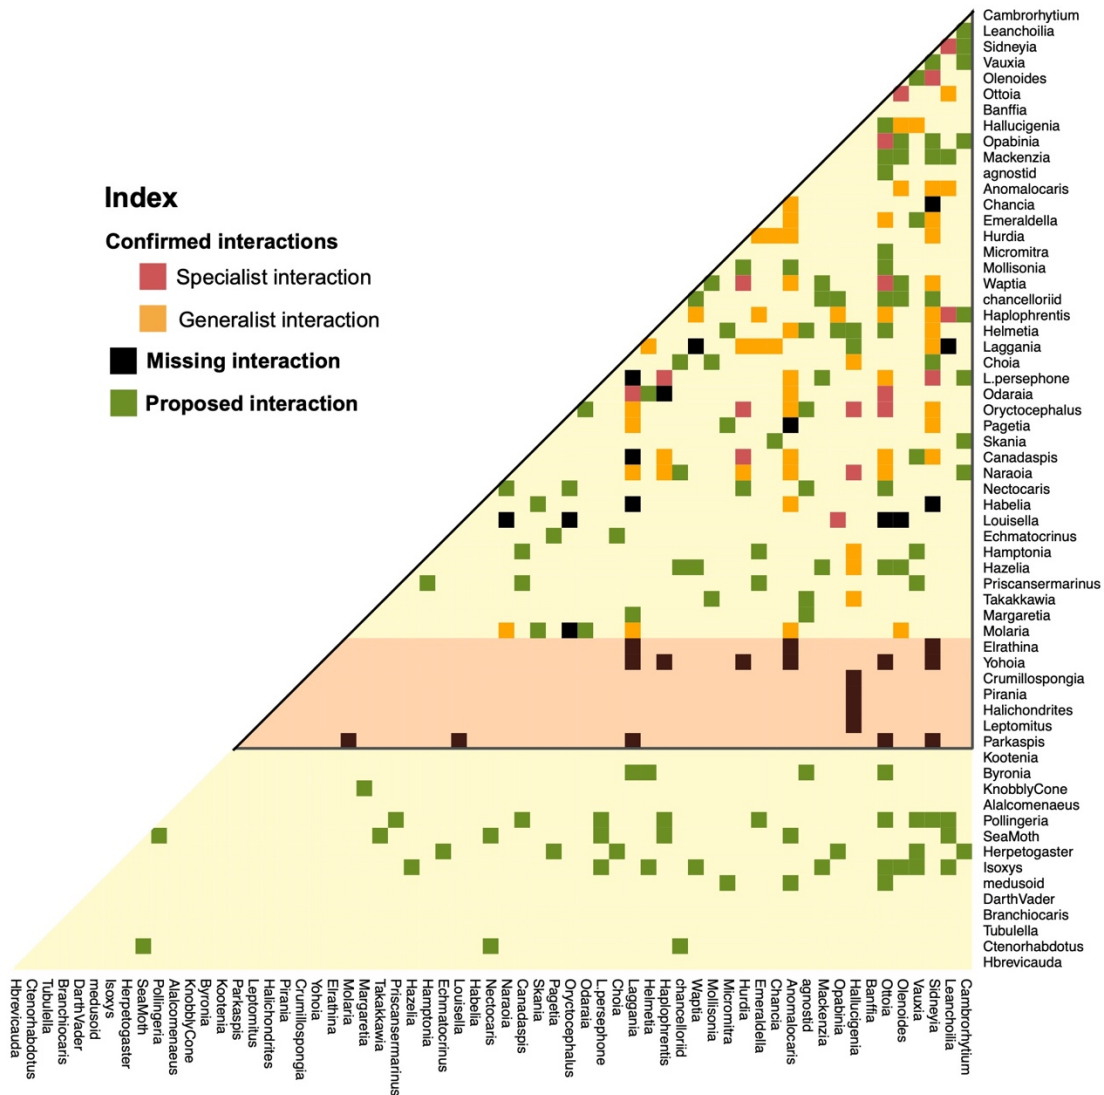

777  
 778 Figure S8: Species interaction matrix showing the results from the categorization analysis, as compared  
 779 with known trophic interactions from literature (Butterfield., 2000; Dunne et al., 2008; Erwin and  
 780 Valentine, 2013), along with breakdown of the confirmed trophic interactions into specialist and  
 781 generalist categories. Confirmed interactions were proposed in the literature and supported in the  
 782 correlation analyses here. Missing interactions are reported elsewhere but did not obtain any support from  
 783 our abundance correlation analyses. Proposed interactions are not currently known from the  
 784 paleontological literature but are suggested by analyses here. The subset of species interactions within the  
 785 black triangle are known from previous studies (Dunne et al., 2008). The species within the light orange  
 786 area were numerically rare in our dataset and no statistically robust prediction could be made regarding  
 787 their interactions.

788  
 789  
 790

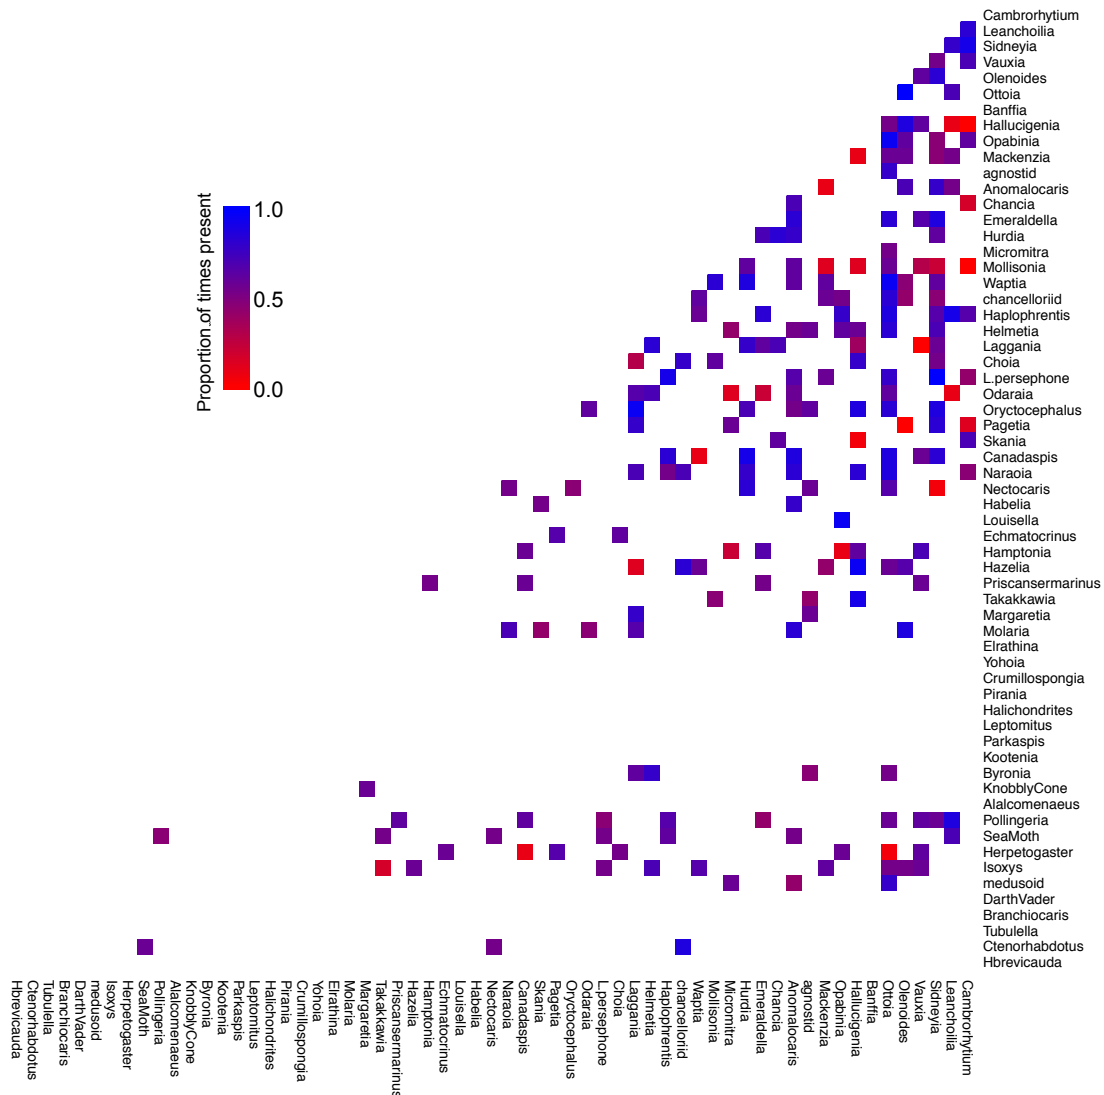

791  
 792 Figure S9: Heatmap showing the proportion of times high fidelity interactions were observed in the same  
 793 categorization. 82.37% of the high-fidelity interactions are present consistently in the same interaction  
 794 category more than 50% of the time (of co-occurrences of the pair of species) and are termed as  
 795 consensus interactions. These consensus interactions are presented in the species interaction half-matrix  
 796 in figure 3 and S8.  
 797  
 798

799

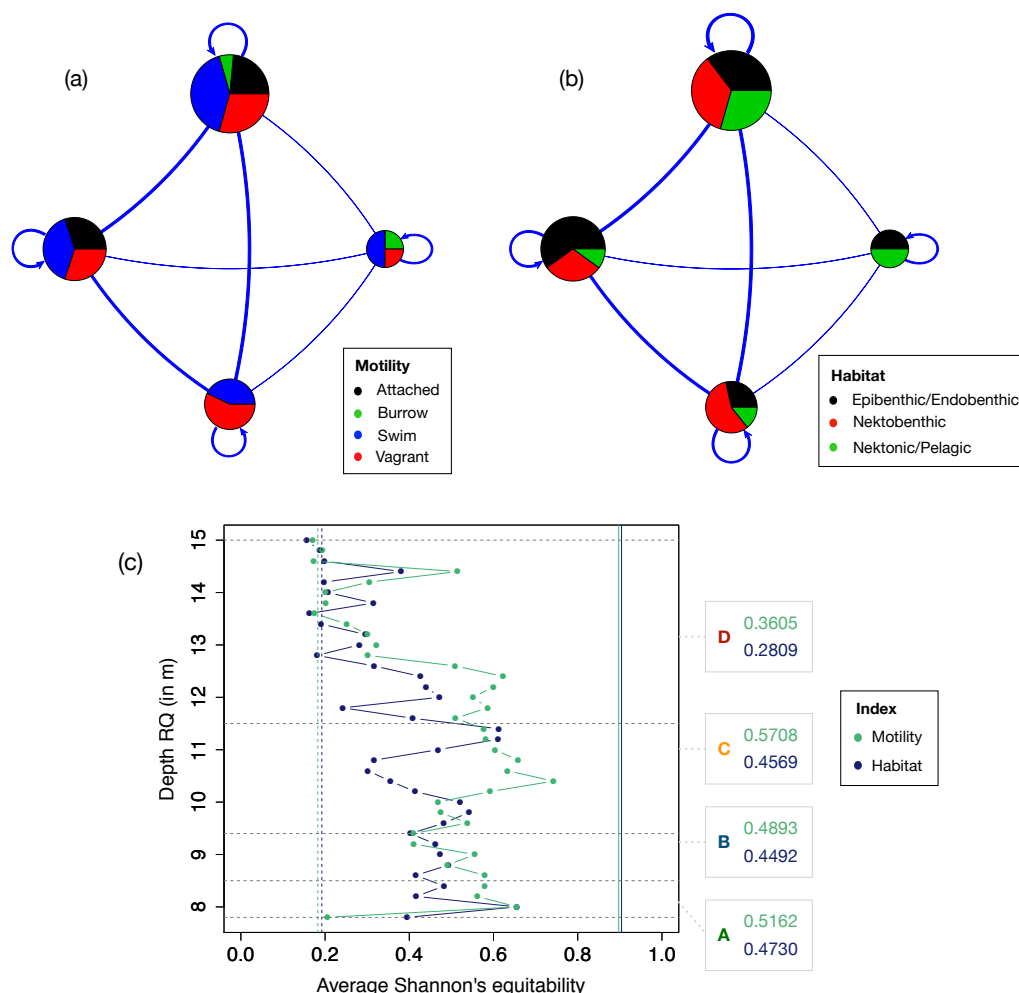

800  
 801 Figure S10: A stochastic block model of the overall network (sub-assemblages A-D) is shown here for  
 802 representation purposes, which depicts four distinct blocks of taxa, estimated using integrated  
 803 classification likelihood, that interact more within blocks than across blocks for motility classes (a) and  
 804 habitat affinity classes (b). The lines between groups and their width denotes interaction between two  
 805 blocks of taxa. Please note that the width of the self-loop here is not meaningful, other than the fact that  
 806 the taxa within a block interact among themselves. The size of the block refers to the number of taxa in  
 807 that block. The model has been overlaid here with (a) motility data, and (b) habitat data. Clearly,  
 808 organisms belonging to particular motility or habitat classes do not fall consistently into SBM blocks.  
 809 This, in turn, suggests that habitat/motility similarity does not transform into very strong associations  
 810 through correlations. Please note that the number of blocks varied in different sub-assemblages and  
 811 running time series analysis, as it is dependent on the structure of the network.  
 812 In (c) we use this SBM model to estimate average Shannon's equitability index (SEI) (methods) for the  
 813 running timeframe analysis and for sub-assemblages (A-D). The grey horizontal dotted lines demarcate  
 814 the sub-assemblages (A-D). The solid lines (separate for motility and habitat) depict the maximum  
 815 theoretical value of SEI possible using our data and the dashed lines represent a theoretical SEI for 95%  
 816 dominance by a single type of habitat/motility (Methods). One can see that, the SEI values depict no  
 817 dependence of correlation network community structure on habitat or motility, except the start and end of  
 818 the assemblage – where a weak dependence cannot be ruled out. This is in lines with the bias coefficient  
 819 (methods, Figure 1(b)).
